# Supplementary material
Source: publisher figshare collection journal article supplement (https://gsajournals.figshare.com/ndownloader/files/21214782)
Supplement: Supplementary file 1 [file 21214782]

## Sheet: mito_variants_aggregated
Table S2. Polymorphic A. thaliana mitogenome variants identified in the 1001 Genomes dataset
Position	Ref Allele	Variant Allele	Seq Type	Variant Type	Samples with Variant	Samples with Coverage	MinorAlleleFreq	Singleton	Brassica (SNPs only)
4235	C	T	intergenic	SNP	1	1027	0.00097371	SRR1945813	NA
4237	G	A	intergenic	SNP	6	1023	0.0058651	No	NA
4670	G	T	intergenic	SNP	4	1032	0.00387597	No	NA
4676	C	A	intergenic	SNP	1	1032	0.000968992	SRR1946239	NA
4784	G	T	intergenic	SNP	1	1029	0.000971817	SRR1946346	NA
4897	T	G	intergenic	SNP	2	979	0.0020429	No	NA
4953	G	T	intergenic	SNP	1	946	0.00105708	SRR1945700	NA
5016	G	A	intergenic	SNP	1	1029	0.000971817	SRR1945578	NA
5100	AC	A	intergenic	Indel	5	925	0.00540541	No	NA
5680	G	A	intergenic	SNP	2	1033	0.00193611	No	G
5683	GTTGCC	G	intergenic	Indel	2	1033	0.00193611	No	NA
5919	G	T	intergenic	SNP	2	1033	0.00193611	No	G
5930	G	A	intergenic	SNP	1	1033	0.000968054	SRR1945994	NA
6025	A	AGTATT	intergenic	Indel	11	1031	0.0106693	No	NA
7278	C	A	intron	SNP	1	876	0.00114155	SRR1945884	C
7589	G	T	intron	SNP	1	928	0.00107759	SRR1946330	G
7608	G	A	intron	SNP	15	948	0.0158228	No	G
7698	G	A	intron	SNP	1	908	0.00110132	SRR1946141	G
8231	G	A	intron	SNP	1	1018	0.000982318	SRR1946140	G
8700	C	CT	intergenic	Indel	2	1022	0.00195695	No	NA
8785	T	G	intergenic	SNP	655	1029	0.36346	No	G
8882	T	TATACA	intergenic	Indel	1	1023	0.000977517	SRR1946324	NA
9305	G	A	intergenic	SNP	1	1032	0.000968992	SRR1946282	NA
9383	C	A	intergenic	SNP	1	1034	0.000967118	SRR1946109	NA
9469	G	T	intergenic	SNP	1	1033	0.000968054	SRR1946324	NA
9622	C	A	intergenic	SNP	1	1029	0.000971817	SRR1946239	NA
9900	G	A	intergenic	SNP	1	1004	0.000996016	SRR1946424	NA
10022	C	T	intergenic	SNP	1	1027	0.00097371	SRR1946324	NA
10401	C	A	intergenic	SNP	8	1032	0.00775194	No	NA
10408	G	T	intergenic	SNP	8	1032	0.00775194	No	NA
10416	T	A	intergenic	SNP	1	1032	0.000968992	SRR1945482	NA
10416	T	G	intergenic	SNP	29	1032	0.0281008	No	NA
10483	G	T	intergenic	SNP	2	1033	0.00193611	No	NA
10600	G	A	intergenic	SNP	72	1033	0.0696999	No	NA
10616	G	GTGTA	intergenic	Indel	1	1034	0.000967118	SRR1945829	NA
10675	G	T	intergenic	SNP	2	1033	0.00193611	No	NA
10687	A	C	intergenic	SNP	1	1034	0.000967118	SRR1946183	NA
10843	G	T	intergenic	SNP	1	1033	0.000968054	SRR1946120	NA
10925	G	T	intergenic	SNP	1	1024	0.000976562	SRR1946148	NA
11115	C	A	intergenic	SNP	22	1034	0.0212766	No	NA
11359	G	T	intergenic	SNP	6	1034	0.00580271	No	NA
11401	C	A	intergenic	SNP	7	1033	0.00677638	No	NA
11594	G	A	intergenic	SNP	3	1033	0.00290416	No	NA
11595	G	A	intergenic	SNP	3	1033	0.00290416	No	NA
11862	G	C	intergenic	SNP	2	1034	0.00193424	No	NA
11887	A	C	intergenic	SNP	5	1034	0.00483559	No	NA
12010	G	T	intergenic	SNP	1	1016	0.000984252	SRR1946153	NA
12096	C	T	intergenic	SNP	17	1033	0.0164569	No	NA
12297	G	C	intergenic	SNP	1	1034	0.000967118	SRR1946301	NA
12327	G	A	intergenic	SNP	22	1034	0.0212766	No	NA
12902	G	GGCGCTA	intergenic	Indel	1	1033	0.000968054	SRR1945813	NA
12973	A	C	intergenic	SNP	1	1033	0.000968054	SRR1945804	NA
13039	GAGAAT	G	intergenic	Indel	2	1032	0.00193798	No	NA
13083	C	G	intergenic	SNP	3	1033	0.00290416	No	NA
13412	C	A	intergenic	SNP	1	1034	0.000967118	SRR1945813	NA
13715	G	T	intergenic	SNP	1	1031	0.000969932	SRR1946152	NA
13790	C	T	intergenic	SNP	1	1019	0.000981354	SRR1946330	NA
13838	G	A	intergenic	SNP	1	998	0.001002	SRR1946321	NA
14128	TAAGAG	T	intergenic	Indel	1	1010	0.000990099	SRR1945999	NA
14298	G	A	intergenic	SNP	2	1031	0.00193986	No	NA
14495	G	T	intergenic	SNP	6	1034	0.00580271	No	NA
14675	G	T	intergenic	SNP	1	1034	0.000967118	SRR1945930	NA
14682	A	C	intergenic	SNP	888	1034	0.141199	No	NA
15163	T	TCCTCTCCTTTTAAGTCGAGTTGCTAAAGCA	intergenic	Indel	1	1034	0.000967118	SRR1946166	NA
15326	G	T	intergenic	SNP	2	1033	0.00193611	No	NA
15445	C	A	intergenic	SNP	1	1014	0.000986193	SRR1946180	NA
15503	C	A	intergenic	SNP	1	1022	0.000978474	SRR1946294	NA
15601	G	A	intergenic	SNP	3	1031	0.0029098	No	NA
15971	G	A	intergenic	SNP	1	1034	0.000967118	SRR1946118	NA
16013	G	A	intergenic	SNP	1	1034	0.000967118	SRR1946284	NA
16055	G	A	intergenic	SNP	1	1034	0.000967118	SRR1946118	NA
16276	G	A	intergenic	SNP	1	1032	0.000968992	SRR1946118	NA
17266	G	T	intergenic	SNP	2	1031	0.00193986	No	G
17660	C	A	intergenic	SNP	7	633	0.0110585	No	A
17927	C	T	coding (nonsynonymous; GTT/ATT; ccmB)	SNP	25	1032	0.0242248	No	C
18678	G	C	intergenic	SNP	1	1034	0.000967118	SRR1946398	NA
18713	G	A	intergenic	SNP	1	1031	0.000969932	SRR1945994	NA
18793	A	AGC	intergenic	Indel	1	1020	0.000980392	SRR1946323	NA
18922	C	T	intergenic	SNP	1	1028	0.000972763	SRR1946237	NA
18931	A	C	intergenic	SNP	631	1027	0.385589	No	NA
18962	G	A	intergenic	SNP	1	993	0.00100705	SRR1946454	NA
19089	GC	G	intergenic	Indel	21	908	0.0231278	No	NA
19091	CT	C	intergenic	Indel	1	899	0.00111235	SRR1946436	NA
19105	G	A	intergenic	SNP	1	866	0.00115473	SRR1946419	NA
19195	G	A	intergenic	SNP	11	655	0.0167939	No	NA
19289	TG	T	intergenic	Indel	1	235	0.00425532	SRR1946428	NA
19290	G	T	intergenic	SNP	166	171	0.0292398	No	NA
19295	G	A	intergenic	SNP	1	195	0.00512821	SRR1946429	NA
19300	A	G	intergenic	SNP	1	154	0.00649351	SRR1946309	NA
19682	G	T	intergenic	SNP	9	1033	0.00871249	No	NA
20190	C	T	coding (nonsynonymous; TCG/TTG; rps3)	SNP	1	1028	0.000972763	SRR1945537	C
20276	C	A	intron	SNP	1	1027	0.00097371	SRR1946117	C
20298	C	A	intron	SNP	1	1005	0.000995025	SRR1946140	C
20444	C	T	intron	SNP	2	980	0.00204082	No	C
20640	G	A	intron	SNP	15	938	0.0159915	No	T
20869	CT	C	intron	Indel	2	978	0.00204499	No	NA
20869	C	A	intron	SNP	5	978	0.00511247	No	NA
20880	T	A	intron	SNP	52	957	0.0543365	No	A
20881	T	A	intron	SNP	52	961	0.0541103	No	A
20882	T	A	intron	SNP	51	957	0.0532915	No	A
20883	G	GA	intron	Indel	2	950	0.00210526	No	NA
21033	G	T	intron	SNP	1	799	0.00125156	SRR1945813	G
21035	A	AAATT	intron	Indel	1	792	0.00126263	SRR1946324	NA
21039	G	T	intron	SNP	10	794	0.0125945	No	G
21152	AACTTT	A	intron	Indel	3	973	0.00308325	No	NA
21308	C	T	intron	SNP	7	917	0.00763359	No	C
21372	G	C	intron	SNP	7	1017	0.00688299	No	G
21875	G	C	coding (nonsynonymous; GGT/GCT; rps3)	SNP	1	917	0.00109051	SRR1946195	G
22013	G	A	coding (nonsynonymous; AGA/AAA; rps3)	SNP	1	685	0.00145985	SRR1946432	G
22333	G	C	coding (nonsynonymous; GAA/CAA; rps3)	SNP	2	705	0.00283688	No	G
22449	G	T	coding (nonsynonymous; TTG/TTT; rps3)	SNP	4	718	0.00557103	No	G
22494	T	G	coding (nonsynonymous; ATT/ATG; rps3)	SNP	1	925	0.00108108	SRR1946324	G
22814	G	A	coding (nonsynonymous; CGG/CAG; rps3)	SNP	2	1030	0.00194175	No	G
23905	G	A	intergenic	SNP	1	1034	0.000967118	SRR1946410	G
24013	CAAGG	C	intergenic	Indel	3	1034	0.00290135	No	NA
24019	A	ATTCC	intergenic	Indel	3	1034	0.00290135	No	NA
24370	C	T	intergenic	SNP	1	1029	0.000971817	SRR1946240	NA
24721	C	A	coding (synonymous; GTC/GTA; nad9)	SNP	94	1033	0.0909971	No	C
25345	G	T	intergenic	SNP	1	1034	0.000967118	SRR1945830	G
25464	G	A	intergenic	SNP	1	1033	0.000968054	SRR1945940	G
25694	C	A	intergenic	SNP	1	1033	0.000968054	SRR1946232	C
26018	A	ATATCG	intergenic	Indel	1	1027	0.00097371	SRR1945646	NA
26391	G	A	intergenic	SNP	1	1022	0.000978474	SRR1946324	G
26413	G	T	intergenic	SNP	2	969	0.00206398	No	T
26475	TTATAA	T	intergenic	Indel	1	717	0.0013947	SRR1946395	NA
26504	C	T	intergenic	SNP	1	697	0.00143472	SRR1946117	C
26581	A	ATGC	intergenic	Indel	2	967	0.00206825	No	NA
26601	TGAAA	T	intergenic	Indel	1	984	0.00101626	SRR1946297	NA
26657	G	T	intergenic	SNP	1	949	0.00105374	SRR1946324	G
27320	G	C	intron	SNP	1	1005	0.000995025	SRR1946398	G
27867	C	A	intron	SNP	3	1034	0.00290135	No	C
27877	G	A	intron	SNP	25	1034	0.0241779	No	G
27904	C	T	intron	SNP	1	1034	0.000967118	SRR1946239	C
28463	C	T	intergenic	SNP	1	1028	0.000972763	SRR1946190	C
28578	T	G	intergenic	SNP	11	1034	0.0106383	No	NA
28607	T	G	intergenic	SNP	6	1034	0.00580271	No	NA
28897	CT	C	intergenic	Indel	13	1033	0.0125847	No	NA
29495	A	T	intergenic	SNP	9	1034	0.00870406	No	NA
30100	G	T	intergenic	SNP	2	1031	0.00193986	No	NA
30378	G	T	intergenic	SNP	1	1025	0.00097561	SRR1945916	NA
30512	G	A	intergenic	SNP	7	939	0.00745474	No	NA
30895	T	TA	intergenic	Indel	1	531	0.00188324	SRR1946437	NA
31094	A	C	intergenic	SNP	1	551	0.00181488	SRR1946109	NA
31727	G	A	intergenic	SNP	1	529	0.00189036	SRR1946140	NA
31831	T	A	intergenic	SNP	31	621	0.0499195	No	NA
31838	T	C	intergenic	SNP	11	643	0.0171073	No	NA
31849	T	A	intergenic	SNP	12	653	0.0183767	No	NA
31852	A	G	intergenic	SNP	11	656	0.0167683	No	NA
31853	G	A	intergenic	SNP	11	657	0.0167428	No	NA
31861	C	A	intergenic	SNP	19	670	0.0283582	No	NA
31863	G	A	intergenic	SNP	19	670	0.0283582	No	NA
31903	C	A	intergenic	SNP	42	720	0.0583333	No	NA
31923	A	C	intergenic	SNP	71	803	0.0884184	No	NA
31964	G	A	intergenic	SNP	153	885	0.172881	No	NA
31990	A	G	intergenic	SNP	176	950	0.185263	No	NA
32031	G	A	intergenic	SNP	8	968	0.00826446	No	NA
32106	C	A	intergenic	SNP	6	1005	0.00597015	No	NA
32112	G	T	intergenic	SNP	12	1005	0.0119403	No	NA
32738	T	C	intergenic	SNP	952	974	0.0225873	No	NA
33124	C	T	intergenic	SNP	4	1007	0.00397219	No	NA
33472	C	T	intergenic	SNP	1	1001	0.000999001	SRR1945999	NA
33697	G	A	intergenic	SNP	1	1004	0.000996016	SRR1946318	NA
34007	TA	T	intergenic	Indel	1	928	0.00107759	SRR1946324	NA
34213	G	T	intergenic	SNP	1	992	0.00100806	SRR1946294	NA
34241	G	T	intergenic	SNP	2	969	0.00206398	No	NA
35024	A	C	intergenic	SNP	1	1008	0.000992063	SRR1946318	NA
35528	G	T	intergenic	SNP	23	1008	0.0228175	No	NA
36386	G	C	intergenic	SNP	6	1007	0.00595829	No	NA
36454	T	C	intergenic	SNP	1	1008	0.000992063	SRR1945822	NA
36778	T	G	intergenic	SNP	1	1034	0.000967118	SRR1946441	NA
36843	C	A	intergenic	SNP	9	1033	0.00871249	No	NA
37155	G	A	intergenic	SNP	1	1034	0.000967118	SRR1946237	NA
37498	C	T	intergenic	SNP	1	1034	0.000967118	SRR1946307	NA
37644	G	A	intergenic	SNP	1	1033	0.000968054	SRR1946196	NA
37782	AAAAAT	A	intergenic	Indel	264	1034	0.255319	No	NA
37919	G	A	intergenic	SNP	1	1034	0.000967118	SRR1946104	NA
38582	C	A	intergenic	SNP	4	1034	0.00386847	No	NA
38885	C	A	intergenic	SNP	2	1034	0.00193424	No	NA
39262	C	A	intergenic	SNP	1	1034	0.000967118	SRR1945859	NA
39281	T	G	intergenic	SNP	1	1034	0.000967118	SRR1946324	NA
39663	C	A	intergenic	SNP	76	1034	0.073501	No	NA
40191	CCTCTTT	C	intergenic	Indel	1	1021	0.000979432	SRR1946387	NA
40198	C	CGAAAGA	intergenic	Indel	1	1023	0.000977517	SRR1946387	NA
40233	C	A	intergenic	SNP	12	1024	0.0117188	No	NA
40507	C	T	intergenic	SNP	2	1028	0.00194553	No	C
40760	A	C	intergenic	SNP	1	1027	0.00097371	SRR1946190	A
40884	C	T	intergenic	SNP	72	1027	0.0701071	No	C
40919	G	A	intergenic	SNP	1	1032	0.000968992	SRR1946118	G
40955	C	G	intergenic	SNP	1	1032	0.000968992	SRR1946148	C
41456	G	T	intergenic	SNP	6	1031	0.00581959	No	G
41773	G	A	intergenic	SNP	2	1033	0.00193611	No	NA
41869	G	T	intergenic	SNP	37	1025	0.0360976	No	NA
41970	G	GGTATA	intergenic	Indel	4	1033	0.00387222	No	NA
42030	T	A	intergenic	SNP	3	1028	0.00291829	No	NA
42087	GA	G	intergenic	Indel	1	1020	0.000980392	SRR1946324	NA
42260	G	T	intergenic	SNP	105	1021	0.10284	No	NA
43386	G	T	intergenic	SNP	6	994	0.00603622	No	G
44105	CAAAA	C	intergenic	Indel	2	1022	0.00195695	No	NA
44575	AAAAC	A	intergenic	Indel	13	991	0.0131181	No	NA
44659	ACATGAAAG	A	intergenic	Indel	72	919	0.078346	No	NA
44748	A	AC	intergenic	Indel	22	1013	0.0217177	No	NA
44811	T	C	intergenic	SNP	3	1033	0.00290416	No	NA
45105	T	C	intergenic	SNP	3	1034	0.00290135	No	NA
45512	C	T	intergenic	SNP	1	1034	0.000967118	SRR1946129	NA
45874	G	T	intergenic	SNP	2	1034	0.00193424	No	NA
45875	T	C	intergenic	SNP	2	1034	0.00193424	No	NA
45876	A	C	intergenic	SNP	2	1034	0.00193424	No	NA
45877	G	A	intergenic	SNP	1	1034	0.000967118	SRR1946424	NA
45910	C	T	intergenic	SNP	1	1034	0.000967118	SRR1946117	NA
46118	G	A	intergenic	SNP	1	1033	0.000968054	SRR1945552	NA
46142	AGTATC	A	intergenic	Indel	1	1033	0.000968054	SRR1946309	NA
46147	C	T	intergenic	SNP	1	1032	0.000968992	SRR1946286	NA
46383	A	C	intergenic	SNP	8	1033	0.00774443	No	NA
46592	TAAAGGTCCGGATTCCACTTCAAAAGGATTTACGCGCGAATTCAACTATAGAC	T	intergenic	Indel	126	1032	0.122093	No	NA
46678	C	G	intergenic	SNP	1	844	0.00118483	SRR1946109	NA
46758	G	T	intergenic	SNP	6	1018	0.00589391	No	NA
47310	G	A	intergenic	SNP	113	1029	0.109815	No	NA
47344	A	ATTTC	intergenic	Indel	6	1032	0.00581395	No	NA
47345	CTGGA	C	intergenic	Indel	6	1032	0.00581395	No	NA
47351	A	G	intergenic	SNP	6	1032	0.00581395	No	NA
47696	G	T	intergenic	SNP	4	1034	0.00386847	No	NA
47859	AGTTT	A	intergenic	Indel	1	1034	0.000967118	SRR1946424	NA
47903	C	CGTAT	intergenic	Indel	1	1034	0.000967118	SRR1946433	NA
47983	G	T	intergenic	SNP	1	1034	0.000967118	SRR1946387	NA
48898	C	T	intergenic	SNP	1	1032	0.000968992	SRR1946330	NA
48910	GT	G	intergenic	Indel	1	1032	0.000968992	SRR1946213	NA
48952	T	A	intergenic	SNP	5	1030	0.00485437	No	NA
48953	T	A	intergenic	SNP	5	1031	0.00484966	No	NA
48954	T	A	intergenic	SNP	5	1031	0.00484966	No	NA
49028	CCATTG	C	intergenic	Indel	1	1031	0.000969932	SRR1946244	NA
49065	CA	C	intergenic	Indel	1	1032	0.000968992	SRR1946324	NA
49085	C	T	intergenic	SNP	3	1032	0.00290698	No	NA
49207	C	T	intergenic	SNP	1	1026	0.000974659	SRR1946396	NA
49267	GAAGAA	G	intergenic	Indel	1	1033	0.000968054	SRR1946117	NA
49273	A	ATTTCT	intergenic	Indel	1	1033	0.000968054	SRR1946117	NA
49303	C	A	intergenic	SNP	5	1033	0.00484027	No	NA
49309	C	T	intergenic	SNP	1	1033	0.000968054	SRR1945874	NA
49340	C	T	intergenic	SNP	1	1034	0.000967118	SRR1945874	NA
49348	C	G	intergenic	SNP	1	1034	0.000967118	SRR1945874	NA
49349	TTCAC	T	intergenic	Indel	1	1034	0.000967118	SRR1945874	NA
49371	CGGA	C	intergenic	Indel	1	1033	0.000968054	SRR1945874	NA
49376	TG	T	intergenic	Indel	1	1032	0.000968992	SRR1945874	NA
56311	C	A	intergenic	SNP	1	1031	0.000969932	SRR1946159	NA
57098	G	A	intergenic	SNP	6	950	0.00631579	No	NA
57390	T	G	intergenic	SNP	1018	1033	0.0145208	No	NA
57523	G	T	intergenic	SNP	1	1034	0.000967118	SRR1946396	G
57578	G	T	intergenic	SNP	1	1034	0.000967118	SRR1946432	G
57838	G	A	intergenic	SNP	1	995	0.00100503	SRR1946160	G
58052	C	A	intergenic	SNP	2	961	0.00208117	No	C
58112	G	A	intergenic	SNP	1	762	0.00131234	SRR1946424	G
58180	CG	C	intergenic	Indel	54	633	0.0853081	No	NA
58180	C	CG	intergenic	Indel	1	633	0.00157978	SRR1945439	NA
58412	C	T	intron	SNP	1	998	0.001002	SRR1946457	C
59594	C	A	intergenic	SNP	1	1007	0.000993049	SRR1945858	C
59897	G	T	intergenic	SNP	1	1028	0.000972763	SRR1946117	G
60023	C	A	intergenic	SNP	1	1015	0.000985222	SRR1946138	C
60077	C	A	intergenic	SNP	1	983	0.00101729	SRR1945850	C
60435	C	A	intergenic	SNP	3	1022	0.00293542	No	C
60947	G	A	intergenic	SNP	3	1019	0.00294406	No	G
61311	C	T	intergenic	SNP	1	1033	0.000968054	SRR1946120	NA
62377	G	T	intergenic	SNP	1	1023	0.000977517	SRR1946140	NA
63499	C	A	intergenic	SNP	9	1024	0.00878906	No	C
64178	G	C	intergenic	SNP	2	1034	0.00193424	No	G
65092	G	A	intergenic	SNP	1	1026	0.000974659	SRR1946201	NA
65145	A	C	intergenic	SNP	6	1030	0.00582524	No	NA
65355	C	A	intergenic	SNP	20	1034	0.0193424	No	NA
65441	G	A	intergenic	SNP	2	1032	0.00193798	No	NA
65637	G	A	intergenic	SNP	1	1026	0.000974659	SRR1946122	NA
66010	GGA	G	intergenic	Indel	1	1033	0.000968054	SRR1946122	NA
66114	T	C	intergenic	SNP	1	1033	0.000968054	SRR1946324	NA
66418	C	A	intergenic	SNP	22	1034	0.0212766	No	NA
66770	C	A	intergenic	SNP	1	1022	0.000978474	SRR1946182	A
66937	T	G	intergenic	SNP	746	933	0.200429	No	G
67545	G	A	coding (synonymous; CTC/CTT; atp1)	SNP	5	1031	0.00484966	No	G
68553	C	T	coding (synonymous; GCG/GCA; atp1)	SNP	21	1021	0.0205681	No	C
68607	A	G	coding (synonymous; CCT/CCC; atp1)	SNP	3	1029	0.00291545	No	G
68613	T	G	coding (nonsynonymous; TTA/TTC; atp1)	SNP	3	1020	0.00294118	No	T
68665	GA	G	intergenic	Indel	2	997	0.00200602	No	NA
68665	G	GA	intergenic	Indel	1	997	0.00100301	SRR1945987	NA
68737	G	T	intergenic	SNP	1	1024	0.000976562	SRR1946324	NA
68960	G	A	intergenic	SNP	8	881	0.00908059	No	NA
69437	TC	T	intergenic	Indel	4	1015	0.00394089	No	NA
69485	G	T	intergenic	SNP	14	1014	0.0138067	No	NA
69737	C	A	intergenic	SNP	1	1034	0.000967118	SRR1946389	NA
69744	TTG	T	intergenic	Indel	3	1034	0.00290135	No	NA
69934	G	A	intergenic	SNP	4	1034	0.00386847	No	NA
70421	G	T	intergenic	SNP	174	1034	0.168279	No	NA
70744	C	A	intergenic	SNP	5	1031	0.00484966	No	NA
70920	G	A	intergenic	SNP	13	1007	0.0129096	No	NA
70995	T	G	intergenic	SNP	1009	1026	0.0165692	No	NA
71216	C	A	intergenic	SNP	1	1033	0.000968054	SRR1945822	NA
71485	C	A	intergenic	SNP	1	1033	0.000968054	SRR1946014	NA
71539	G	T	intergenic	SNP	1	1034	0.000967118	SRR1946391	NA
72059	T	C	intergenic	SNP	1	1034	0.000967118	SRR1946239	NA
72772	C	CTATAG	intergenic	Indel	1	1034	0.000967118	SRR1946324	NA
72831	G	A	intergenic	SNP	1	1034	0.000967118	SRR1946318	NA
72938	C	T	intergenic	SNP	107	1034	0.103482	No	NA
73139	C	T	intergenic	SNP	1	1034	0.000967118	SRR1946330	NA
73332	C	A	intergenic	SNP	2	1031	0.00193986	No	NA
73439	G	A	intergenic	SNP	1	1032	0.000968992	SRR1946108	NA
73796	G	T	intergenic	SNP	1	1034	0.000967118	SRR1946438	NA
74095	G	T	intergenic	SNP	9	1034	0.00870406	No	NA
74652	C	T	intergenic	SNP	5	1034	0.00483559	No	NA
75516	C	A	intergenic	SNP	1	1034	0.000967118	SRR1946286	NA
75740	AAGTAT	A	intergenic	Indel	20	1034	0.0193424	No	NA
76105	C	CATCTTG	intergenic	Indel	1	1034	0.000967118	SRR1945994	NA
76140	AATTAC	A	intergenic	Indel	1	1034	0.000967118	SRR1946424	NA
76235	G	T	intergenic	SNP	3	1034	0.00290135	No	NA
76371	C	A	intergenic	SNP	3	1034	0.00290135	No	NA
76388	G	T	intergenic	SNP	1	1034	0.000967118	SRR1946324	NA
76393	C	A	intergenic	SNP	19	1034	0.0183752	No	NA
76796	G	T	intergenic	SNP	78	1032	0.0755814	No	NA
76957	C	G	intergenic	SNP	1	1034	0.000967118	SRR1946387	NA
77081	ACTGTTCGTACCCCGTTGG	A	intergenic	Indel	1	1034	0.000967118	SRR1946232	NA
77162	CAAAAT	C	intergenic	Indel	3	1033	0.00290416	No	NA
77303	G	A	intergenic	SNP	1	1033	0.000968054	SRR1946391	NA
77337	C	G	intergenic	SNP	1	1033	0.000968054	SRR1945734	NA
77730	G	T	intergenic	SNP	7	1032	0.00678295	No	NA
77858	G	A	intergenic	SNP	2	1030	0.00194175	No	NA
78049	C	T	intergenic	SNP	94	1029	0.0913508	No	NA
78141	C	T	intergenic	SNP	1	1033	0.000968054	SRR1945829	NA
78267	C	A	intergenic	SNP	1	1033	0.000968054	SRR1946432	NA
78819	A	C	intergenic	SNP	2	885	0.00225989	No	NA
78896	G	T	intergenic	SNP	4	791	0.00505689	No	NA
79012	TC	T	intergenic	Indel	5	93	0.0537634	No	NA
79055	C	A	intergenic	SNP	1	595	0.00168067	SRR1946184	NA
79882	G	T	coding (nonsynonymous; GAG/GAT; rps7)	SNP	1	1034	0.000967118	SRR1946108	G
80193	C	A	intergenic	SNP	1	1034	0.000967118	SRR1946091	C
80251	TC	T	intergenic	Indel	3	1033	0.00290416	No	NA
80428	C	T	intergenic	SNP	9	1034	0.00870406	No	NA
80563	C	A	intergenic	SNP	1	1032	0.000968992	SRR1946161	NA
80570	G	C	intergenic	SNP	1	1033	0.000968054	SRR1946284	NA
80705	A	C	intergenic	SNP	3	1034	0.00290135	No	NA
80957	G	GAAAGC	intergenic	Indel	1	1034	0.000967118	SRR1946324	NA
81460	G	A	intergenic	SNP	1	1034	0.000967118	SRR1946330	NA
81745	C	A	intergenic	SNP	1	1034	0.000967118	SRR1945813	C
82806	G	T	intergenic	SNP	1	1011	0.00098912	SRR1946077	G
82810	G	A	intergenic	SNP	1	1015	0.000985222	SRR1946282	G
83639	G	C	intergenic	SNP	1	756	0.00132275	SRR1945970	NA
83860	G	T	intergenic	SNP	7	956	0.00732218	No	NA
84173	T	C	intergenic	SNP	1	1015	0.000985222	SRR1945886	C
85479	A	C	intergenic	SNP	1	1028	0.000972763	SRR1946324	NA
85486	C	A	intergenic	SNP	1	1030	0.000970874	SRR1945920	NA
85620	C	T	intergenic	SNP	6	1031	0.00581959	No	NA
85634	G	A	intergenic	SNP	3	1031	0.0029098	No	NA
85718	C	T	intergenic	SNP	1	1033	0.000968054	SRR1946237	NA
86206	A	G	intergenic	SNP	2	1034	0.00193424	No	NA
86449	G	A	intergenic	SNP	25	1033	0.0242014	No	NA
86642	A	C	intergenic	SNP	1	1034	0.000967118	SRR1946324	NA
87156	C	G	intergenic	SNP	1	1034	0.000967118	SRR1946234	NA
87397	C	T	intergenic	SNP	1	1032	0.000968992	SRR1946324	NA
87450	G	T	intergenic	SNP	1	1033	0.000968054	SRR1946108	NA
87463	C	A	intergenic	SNP	1	1033	0.000968054	SRR1946120	NA
87619	C	A	intergenic	SNP	15	1033	0.0145208	No	NA
88174	G	T	intergenic	SNP	1	1034	0.000967118	SRR1946451	NA
88521	C	A	intergenic	SNP	34	1034	0.032882	No	NA
88843	A	T	intergenic	SNP	3	1033	0.00290416	No	NA
88984	C	T	intergenic	SNP	2	1032	0.00193798	No	NA
90499	C	A	intergenic	SNP	3	1034	0.00290135	No	NA
90523	G	A	intergenic	SNP	1	1034	0.000967118	SRR1946284	NA
90717	C	T	intergenic	SNP	2	1034	0.00193424	No	NA
91019	C	A	intergenic	SNP	2	1034	0.00193424	No	NA
91285	G	A	intergenic	SNP	1	1034	0.000967118	SRR1946432	NA
91602	A	G	intergenic	SNP	1	1028	0.000972763	SRR1946324	NA
91897	C	T	intergenic	SNP	1	1033	0.000968054	SRR1946286	NA
92268	C	A	intergenic	SNP	2	1008	0.00198413	No	C
92500	G	T	intergenic	SNP	25	1026	0.0243665	No	G
92744	GA	G	intergenic	Indel	6	986	0.00608519	No	NA
92744	G	GA	intergenic	Indel	1	986	0.0010142	SRR1945643	NA
92744	G	T	intergenic	SNP	1	986	0.0010142	SRR1945643	NA
93728	G	T	intron	SNP	2	1031	0.00193986	No	G
93944	C	A	intron	SNP	1	1023	0.000977517	SRR1946324	C
93951	G	A	intron	SNP	1	1020	0.000980392	SRR1945987	G
95319	T	G	intron	SNP	981	1000	0.019	No	G
95914	G	C	intron	SNP	15	876	0.0171233	No	G
96065	C	T	intron	SNP	1	904	0.00110619	SRR1946432	C
96544	C	T	intron	SNP	1	1032	0.000968992	SRR1946324	C
96629	TG	T	intron	Indel	1	1025	0.00097561	SRR1946324	NA
97138	C	T	intron	SNP	1	1032	0.000968992	SRR1946321	NA
98076	G	A	intergenic	SNP	3	990	0.0030303	No	G
98240	C	A	intergenic	SNP	610	994	0.386318	No	A
99196	C	A	intergenic	SNP	1	995	0.00100503	SRR1945829	NA
99791	T	C	intergenic	SNP	1	1034	0.000967118	SRR1946324	NA
100318	T	C	intergenic	SNP	1	1034	0.000967118	SRR1946324	NA
100752	G	A	intergenic	SNP	31	1034	0.0299807	No	NA
101232	T	TA	intergenic	Indel	2	1034	0.00193424	No	NA
101258	C	T	intergenic	SNP	1	1033	0.000968054	SRR1946321	NA
101651	C	A	intergenic	SNP	1	1033	0.000968054	SRR1946329	NA
102018	G	A	intergenic	SNP	98	1034	0.0947776	No	NA
102299	G	A	intergenic	SNP	1	1034	0.000967118	SRR1946120	NA
102350	G	A	intergenic	SNP	2	1033	0.00193611	No	NA
102709	C	A	intergenic	SNP	9	1004	0.00896414	No	NA
102790	C	A	intergenic	SNP	1	1017	0.000983284	SRR1946120	NA
102798	G	T	intergenic	SNP	7	1017	0.00688299	No	NA
103128	C	CTATAA	intergenic	Indel	1	1019	0.000981354	SRR1945673	NA
104517	T	TACTATA	intergenic	Indel	1	1034	0.000967118	SRR1946141	NA
104845	C	A	intergenic	SNP	320	1034	0.309478	No	NA
106088	C	A	intergenic	SNP	23	1034	0.0222437	No	NA
107099	ATCG	A	intergenic	Indel	1	1034	0.000967118	SRR1946118	NA
107104	A	AG	intergenic	Indel	1	1034	0.000967118	SRR1946118	NA
107105	A	AGAC	intergenic	Indel	1	1034	0.000967118	SRR1946118	NA
108527	G	A	intergenic	SNP	1	1034	0.000967118	SRR1945882	NA
108647	T	G	intergenic	SNP	1	1034	0.000967118	SRR1946324	NA
109286	C	A	intergenic	SNP	1	1034	0.000967118	SRR1945994	NA
109722	C	A	intergenic	SNP	7	1033	0.00677638	No	NA
109917	C	A	intergenic	SNP	3	1034	0.00290135	No	NA
109943	G	A	intergenic	SNP	1	1025	0.00097561	SRR1946286	NA
109958	G	A	intergenic	SNP	3	1030	0.00291262	No	NA
109992	A	G	intergenic	SNP	1	1034	0.000967118	SRR1945994	NA
110117	TA	T	intergenic	Indel	1	1032	0.000968992	SRR1946387	NA
110533	T	A	intergenic	SNP	6	1033	0.00580833	No	NA
110534	T	A	intergenic	SNP	6	1033	0.00580833	No	NA
110535	T	A	intergenic	SNP	6	1033	0.00580833	No	NA
110655	C	A	intergenic	SNP	1	1034	0.000967118	SRR1945987	NA
111203	G	T	intergenic	SNP	1	1034	0.000967118	SRR1945686	NA
111921	C	T	intergenic	SNP	1	1031	0.000969932	SRR1946432	NA
112091	C	A	intergenic	SNP	1	906	0.00110375	SRR1946424	NA
112151	C	T	intergenic	SNP	1	830	0.00120482	SRR1945443	NA
112676	AAATC	A	intergenic	Indel	15	1034	0.0145068	No	NA
112959	G	A	intergenic	SNP	2	1034	0.00193424	No	NA
113319	G	A	intergenic	SNP	3	1032	0.00290698	No	NA
113725	C	A	intergenic	SNP	1	1033	0.000968054	SRR1946232	NA
113781	G	A	intergenic	SNP	2	1034	0.00193424	No	A
113897	G	GGAAA	intergenic	Indel	1	1034	0.000967118	SRR1945728	NA
114379	G	T	intergenic	SNP	1	1033	0.000968054	SRR1946427	G
115305	G	T	coding (synonymous; ATC/ATA; cox1)	SNP	1	1034	0.000967118	SRR1946324	G
115386	G	T	coding (synonymous; ATC/ATA; cox1)	SNP	1	1034	0.000967118	SRR1945784	G
116572	G	A	intergenic	SNP	20	1032	0.0193798	No	NA
116781	C	A	intergenic	SNP	1	1031	0.000969932	SRR1946329	NA
116793	G	T	intergenic	SNP	4	1034	0.00386847	No	NA
117100	C	A	intergenic	SNP	2	1034	0.00193424	No	NA
117678	G	T	intergenic	SNP	11	1033	0.0106486	No	NA
117685	G	T	intergenic	SNP	1	1033	0.000968054	SRR1946424	NA
117712	A	AG	intergenic	Indel	6	1031	0.00581959	No	NA
117714	AC	A	intergenic	Indel	6	1029	0.0058309	No	NA
118060	G	A	intergenic	SNP	9	1005	0.00895522	No	NA
118568	G	T	intergenic	SNP	1	1024	0.000976562	SRR1946171	NA
118918	C	A	intergenic	SNP	1	1030	0.000970874	SRR1945876	NA
119037	CGTCT	C	intergenic	Indel	1	1028	0.000972763	SRR1946283	NA
119381	G	C	intergenic	SNP	1	1034	0.000967118	SRR1946232	NA
119764	T	A	intergenic	SNP	1	1033	0.000968054	SRR1946437	NA
120065	C	T	intergenic	SNP	1	1033	0.000968054	SRR1946324	NA
120079	T	G	intergenic	SNP	7	1034	0.00676983	No	NA
120080	C	A	intergenic	SNP	7	1033	0.00677638	No	NA
120136	C	A	intergenic	SNP	218	1029	0.211856	No	NA
120285	G	A	intergenic	SNP	2	1034	0.00193424	No	NA
120813	A	G	intergenic	SNP	3	1034	0.00290135	No	NA
120966	C	T	intergenic	SNP	1	1033	0.000968054	SRR1946436	NA
121206	G	A	intergenic	SNP	1	1034	0.000967118	SRR1946394	NA
121298	C	A	intergenic	SNP	1	1034	0.000967118	SRR1945739	NA
121485	A	C	intergenic	SNP	637	1034	0.383946	No	NA
121502	T	G	intergenic	SNP	4	1034	0.00386847	No	NA
122240	G	T	intergenic	SNP	2	1033	0.00193611	No	NA
122384	C	A	intergenic	SNP	1	1034	0.000967118	SRR1945435	C
122701	G	A	intergenic	SNP	1	1032	0.000968992	SRR1946302	G
123172	C	T	intergenic	SNP	1	1034	0.000967118	SRR1945874	C
123516	T	TTATTAA	intergenic	Indel	1	1033	0.000968054	SRR1945915	NA
124185	G	T	intergenic	SNP	1	1000	0.001	SRR1946318	NA
125293	A	C	intergenic	SNP	417	1034	0.403288	No	NA
126267	G	A	intergenic	SNP	1	974	0.00102669	SRR1946432	NA
128520	C	A	intergenic	SNP	16	1034	0.0154739	No	NA
128523	G	A	intergenic	SNP	1	1034	0.000967118	SRR1945754	NA
128706	G	T	intergenic	SNP	17	1031	0.0164888	No	NA
128713	C	A	intergenic	SNP	1	1030	0.000970874	SRR1946141	NA
128797	G	A	intergenic	SNP	1	1033	0.000968054	SRR1946239	NA
129679	T	A	intergenic	SNP	7	357	0.0196078	No	NA
130079	G	C	intergenic	SNP	1	1027	0.00097371	SRR1946141	NA
130423	C	T	intergenic	SNP	7	1034	0.00676983	No	C
130452	C	T	intergenic	SNP	1	1034	0.000967118	SRR1946391	C
130596	G	T	intergenic	SNP	17	1034	0.016441	No	G
131913	C	A	intergenic	SNP	4	1034	0.00386847	No	NA
131931	GTTAGCC	G	intergenic	Indel	13	1033	0.0125847	No	NA
131980	C	T	intergenic	SNP	1	1033	0.000968054	SRR1946318	NA
132039	G	A	intergenic	SNP	1	1034	0.000967118	SRR1946432	NA
133739	G	T	intergenic	SNP	25	1034	0.0241779	No	NA
134217	G	T	intergenic	SNP	1	1034	0.000967118	SRR1946080	NA
134544	TCTTG	T	intergenic	Indel	17	1020	0.0166667	No	NA
134552	CAAAT	C	intergenic	Indel	17	1019	0.016683	No	NA
134898	GAAGA	G	intergenic	Indel	15	1033	0.0145208	No	NA
135415	C	T	intergenic	SNP	1	1028	0.000972763	SRR1945734	NA
135625	C	A	intergenic	SNP	1	1034	0.000967118	SRR1946324	NA
135865	C	G	intergenic	SNP	22	1034	0.0212766	No	NA
136475	G	A	intergenic	SNP	1	1034	0.000967118	SRR1945994	NA
136660	G	T	intergenic	SNP	298	1034	0.288201	No	NA
136992	G	C	intergenic	SNP	8	1034	0.00773694	No	NA
137444	G	T	intergenic	SNP	1	1034	0.000967118	SRR1946324	NA
137722	T	G	intergenic	SNP	1	1025	0.00097561	SRR1946429	NA
137976	C	T	intergenic	SNP	1	1034	0.000967118	SRR1946437	C
138439	C	T	intergenic	SNP	1	1033	0.000968054	SRR1946387	C
138772	C	T	intergenic	SNP	1	926	0.00107991	SRR1946432	NA
138972	T	G	intergenic	SNP	1	1032	0.000968992	SRR1946324	NA
138973	T	A	intergenic	SNP	1	1032	0.000968992	SRR1946324	NA
138977	G	C	intergenic	SNP	1	1032	0.000968992	SRR1946324	NA
139142	TTATG	T	intergenic	Indel	1	1034	0.000967118	SRR1946324	NA
139152	T	G	intergenic	SNP	1	1034	0.000967118	SRR1946324	NA
139153	T	A	intergenic	SNP	1	1034	0.000967118	SRR1946324	NA
139159	A	T	intergenic	SNP	1	1034	0.000967118	SRR1946324	NA
139160	A	C	intergenic	SNP	1	1034	0.000967118	SRR1946324	NA
139321	AGTAC	A	intergenic	Indel	20	1034	0.0193424	No	NA
139535	G	A	intergenic	SNP	1	1033	0.000968054	SRR1945850	G
139759	A	T	intergenic	SNP	267	1034	0.258221	No	A
139869	TC	T	intergenic	Indel	57	1034	0.0551257	No	NA
139944	G	A	intergenic	SNP	1	1033	0.000968054	SRR1946118	G
140278	C	A	intergenic	SNP	2	1024	0.00195312	No	NA
140287	TAATTCCAAG	T	intergenic	Indel	1	1022	0.000978474	SRR1946117	NA
140766	G	T	intergenic	SNP	9	1034	0.00870406	No	G
141632	G	T	rRNA	SNP	1	1008	0.000992063	SRR1946315	G
142086	C	A	rRNA	SNP	1	1002	0.000998004	SRR1946236	C
142778	G	A	rRNA	SNP	1	1028	0.000972763	SRR1946224	G
144301	TCTTTCC	T	intergenic	Indel	4	1034	0.00386847	No	NA
144405	T	TTGGGA	intergenic	Indel	13	1034	0.0125725	No	NA
144417	C	T	intergenic	SNP	9	1034	0.00870406	No	NA
145301	G	T	intergenic	SNP	1	1033	0.000968054	SRR1946391	G
145445	C	T	intergenic	SNP	22	1034	0.0212766	No	C
145661	A	G	intergenic	SNP	9	1034	0.00870406	No	NA
145938	G	T	intergenic	SNP	2	1033	0.00193611	No	NA
146443	G	A	intergenic	SNP	1	1033	0.000968054	SRR1946243	G
146485	C	G	intergenic	SNP	107	1033	0.103582	No	C
146565	T	G	intergenic	SNP	1	1032	0.000968992	SRR1946324	G
146774	G	T	intergenic	SNP	3	1033	0.00290416	No	T
146980	C	A	intergenic	SNP	1	1030	0.000970874	SRR1946175	C
147540	C	A	intergenic	SNP	3	1034	0.00290135	No	NA
147957	G	T	intergenic	SNP	1	1034	0.000967118	SRR1945899	NA
149048	C	CTACA	intergenic	Indel	27	1034	0.0261122	No	NA
149860	G	T	intergenic	SNP	1	1034	0.000967118	SRR1946316	NA
150074	G	T	intergenic	SNP	12	1034	0.0116054	No	NA
150361	G	T	intergenic	SNP	1	1034	0.000967118	SRR1945662	NA
150677	C	A	intergenic	SNP	1	1033	0.000968054	SRR1946296	NA
150798	G	C	intergenic	SNP	2	1033	0.00193611	No	G
151204	C	A	intergenic	SNP	1	1034	0.000967118	SRR1946239	NA
151503	C	G	intergenic	SNP	15	1034	0.0145068	No	NA
151576	C	A	intergenic	SNP	2	1033	0.00193611	No	NA
152664	T	A	intergenic	SNP	1	1034	0.000967118	SRR1946034	NA
152863	C	A	intergenic	SNP	1	1034	0.000967118	SRR1946448	NA
152873	AC	A	intergenic	Indel	86	1034	0.0831721	No	NA
153383	G	T	intergenic	SNP	1	1033	0.000968054	SRR1946286	NA
153475	G	T	intergenic	SNP	1	1034	0.000967118	SRR1946154	NA
153603	G	T	intergenic	SNP	1	1034	0.000967118	SRR1946123	NA
154114	A	T	intergenic	SNP	1	1032	0.000968992	SRR1945758	NA
154174	A	C	intergenic	SNP	1	1034	0.000967118	SRR1946191	NA
154530	G	T	intergenic	SNP	1	1034	0.000967118	SRR1946397	NA
154815	C	T	intergenic	SNP	4	1031	0.00387973	No	NA
155206	C	A	intergenic	SNP	1	1034	0.000967118	SRR1946078	C
155340	C	A	intergenic	SNP	1	1034	0.000967118	SRR1946406	C
155451	G	A	intergenic	SNP	2	1032	0.00193798	No	G
156425	G	A	intergenic	SNP	1	1016	0.000984252	SRR1945940	G
156699	G	T	intergenic	SNP	1	1034	0.000967118	SRR1946324	NA
156722	C	A	intergenic	SNP	26	1034	0.0251451	No	NA
156957	T	C	intergenic	SNP	2	1028	0.00194553	No	NA
157177	G	T	intergenic	SNP	1	1032	0.000968992	SRR1946234	NA
157286	C	A	intergenic	SNP	1	1033	0.000968054	SRR1945899	NA
157845	G	A	intergenic	SNP	5	1034	0.00483559	No	G
159689	AGAGTTTTGT	A	intergenic	Indel	1	993	0.00100705	SRR1946239	NA
159701	C	CCACAAAACT	intergenic	Indel	1	993	0.00100705	SRR1946239	NA
160154	C	T	coding (nonsynonymous; CCG/TCG; rps4)	SNP	15	1024	0.0146484	No	C
161281	G	C	intergenic	SNP	3	947	0.0031679	No	NA
161509	CGA	C	intergenic	Indel	18	981	0.0183486	No	NA
162034	C	A	intron	SNP	7	884	0.00791855	No	C
162093	T	TG	intron	Indel	13	662	0.0196375	No	NA
162445	A	C	intron	SNP	307	993	0.309164	No	C
162491	G	A	intron	SNP	1	987	0.00101317	SRR1945999	T
163509	CG	C	intergenic	Indel	2	629	0.00317965	No	NA
163519	G	T	intergenic	SNP	4	687	0.00582242	No	G
164270	G	T	intergenic	SNP	104	1030	0.100971	No	T
164928	CG	C	intergenic	Indel	1	1034	0.000967118	SRR1946038	NA
165634	CG	C	intergenic	Indel	1	1033	0.000968054	SRR1946420	NA
165636	CTCCG	C	intergenic	Indel	1	1033	0.000968054	SRR1946420	NA
165643	G	A	intergenic	SNP	1	1034	0.000967118	SRR1946420	G
166628	G	C	intergenic	SNP	1	1034	0.000967118	SRR1946399	G
166701	G	A	intergenic	SNP	1	1034	0.000967118	SRR1946429	G
166715	C	A	intergenic	SNP	2	1034	0.00193424	No	NA
166865	C	A	intergenic	SNP	1	1034	0.000967118	SRR1946175	NA
166999	G	T	intergenic	SNP	1	1034	0.000967118	SRR1946282	NA
167284	C	A	intergenic	SNP	1	1028	0.000972763	SRR1945591	NA
167437	C	T	intergenic	SNP	1	1034	0.000967118	SRR1946177	NA
168097	C	A	intergenic	SNP	2	1034	0.00193424	No	NA
168221	G	A	intergenic	SNP	1	1034	0.000967118	SRR1946439	NA
168238	A	C	intergenic	SNP	637	1034	0.383946	No	NA
168580	G	T	intergenic	SNP	174	1034	0.168279	No	NA
169217	C	T	intergenic	SNP	1	1032	0.000968992	SRR1945846	NA
169455	C	A	intergenic	SNP	16	1034	0.0154739	No	NA
169663	C	A	intergenic	SNP	2	1033	0.00193611	No	NA
169740	A	C	intergenic	SNP	1	1034	0.000967118	SRR1946324	NA
170668	C	A	intergenic	SNP	3	1033	0.00290416	No	NA
170676	C	A	intergenic	SNP	1	1033	0.000968054	SRR1946387	NA
171095	G	T	intergenic	SNP	27	983	0.0274669	No	NA
171515	G	T	intergenic	SNP	5	1028	0.00486381	No	NA
172944	C	T	intergenic	SNP	6	939	0.00638978	No	NA
173730	G	C	intergenic	SNP	6	1034	0.00580271	No	NA
173977	C	A	intergenic	SNP	3	1034	0.00290135	No	NA
174200	C	A	intergenic	SNP	2	1034	0.00193424	No	NA
174386	C	T	intergenic	SNP	6	1033	0.00580833	No	NA
174438	G	T	intergenic	SNP	8	1034	0.00773694	No	NA
174761	G	A	intergenic	SNP	19	1034	0.0183752	No	NA
174856	C	G	intergenic	SNP	1	1034	0.000967118	SRR1946397	NA
175782	CGGAGCTGTCGAGTAAGGATTGGCCGAGGGCTGTTATGTACCTGGGAATCAGCCAATCAAAAATAGACAAAGAAAAGCGAGCTCTGAGCAGGCAGAGCTAATGCAAGTAGGGCCAACGAGGACTCTGGTCA	C	intergenic	Indel	1	1032	0.000968992	SRR1946388	NA
175989	G	C	intergenic	SNP	1	1030	0.000970874	SRR1946282	NA
177047	C	T	intergenic	SNP	5	1033	0.00484027	No	NA
177105	G	T	intergenic	SNP	11	1034	0.0106383	No	NA
177323	C	T	intergenic	SNP	1	1034	0.000967118	SRR1946077	NA
177412	G	A	intergenic	SNP	7	1034	0.00676983	No	NA
177809	T	G	intergenic	SNP	637	1034	0.383946	No	NA
177844	G	A	intergenic	SNP	1	1034	0.000967118	SRR1946283	NA
177914	G	T	intergenic	SNP	96	1033	0.0929332	No	NA
178413	G	T	intergenic	SNP	8	1033	0.00774443	No	NA
179703	T	G	intergenic	SNP	1004	1032	0.0271318	No	NA
180120	C	T	intergenic	SNP	2	1034	0.00193424	No	NA
180394	G	T	intergenic	SNP	3	1020	0.00294118	No	G
180450	T	TC	intergenic	Indel	56	1029	0.0544218	No	NA
180946	GTTATA	G	intergenic	Indel	6	882	0.00680272	No	NA
181497	G	T	intergenic	SNP	8	710	0.0112676	No	G
181535	G	T	intergenic	SNP	1	785	0.00127389	SRR1946324	G
182046	G	A	coding (synonymous; ACC/ACT; cob)	SNP	2	1031	0.00193986	No	G
182929	C	A	intergenic	SNP	11	794	0.0138539	No	A
183012	G	T	intergenic	SNP	119	947	0.12566	No	G
183267	C	T	intergenic	SNP	1	1025	0.00097561	SRR1946407	C
183423	G	T	intergenic	SNP	15	1031	0.014549	No	T
183661	GA	G	intergenic	Indel	1	569	0.00175747	SRR1946023	NA
184345	GGGTT	G	intergenic	Indel	2	1030	0.00194175	No	NA
184483	C	T	pseudo	SNP	2	1034	0.00193424	No	C
184558	G	T	pseudo	SNP	1	1034	0.000967118	SRR1945848	G
185381	G	T	intergenic	SNP	1	1034	0.000967118	SRR1946374	G
185517	C	G	intergenic	SNP	37	1033	0.035818	No	NA
186571	G	T	intergenic	SNP	1	1034	0.000967118	SRR1946324	NA
186645	C	A	intergenic	SNP	1	1034	0.000967118	SRR1945813	NA
187027	G	A	intergenic	SNP	4	1016	0.00393701	No	NA
187177	C	T	intergenic	SNP	1	1033	0.000968054	SRR1946220	NA
187407	T	C	intergenic	SNP	1	1034	0.000967118	SRR1946282	NA
187532	C	A	intergenic	SNP	3	1032	0.00290698	No	NA
188176	A	ATC	intergenic	Indel	1	1034	0.000967118	SRR1946324	NA
188365	T	G	intergenic	SNP	1	1033	0.000968054	SRR1946324	NA
188535	C	A	intergenic	SNP	2	1027	0.00194742	No	NA
189141	CA	C	intergenic	Indel	14	977	0.0143296	No	NA
189141	C	A	intergenic	SNP	3	977	0.00307062	No	NA
189429	C	A	intergenic	SNP	2	1033	0.00193611	No	C
189516	A	C	coding (nonsynonymous; ATT/CTT; ccmFC)	SNP	74	1013	0.0730503	No	C
189824	C	A	coding (synonymous; CTC/CTA; ccmFC)	SNP	2	1023	0.00195503	No	C
190087	G	A	coding (nonsynonymous; GGT/GAT; ccmFC)	SNP	50	959	0.0521376	No	G
190088	T	G	coding (synonymous; GGT/GGG; ccmFC)	SNP	50	954	0.0524109	No	T
190513	C	T	intron	SNP	1	982	0.00101833	SRR1946459	C
190789	A	T	intron	SNP	19	833	0.0228091	No	A
190790	A	T	intron	SNP	19	830	0.0228916	No	A
190791	A	T	intron	SNP	19	831	0.022864	No	A
190800	C	A	intron	SNP	2	839	0.00238379	No	C
191051	C	T	intron	SNP	1	815	0.00122699	SRR1945906	C
191326	C	T	coding (synonymous; CCC/CCT; ccmFC)	SNP	3	1034	0.00290135	No	C
191808	C	A	intergenic	SNP	3	997	0.00300903	No	C
191910	C	T	intergenic	SNP	92	1024	0.0898438	No	C
192124	G	A	intergenic	SNP	1	962	0.0010395	SRR1946307	G
192213	C	A	intergenic	SNP	27	1008	0.0267857	No	C
192282	G	T	intergenic	SNP	1	1033	0.000968054	SRR1946071	G
192579	G	T	intergenic	SNP	2	1033	0.00193611	No	G
192770	G	A	intergenic	SNP	11	1034	0.0106383	No	G
192862	C	T	intergenic	SNP	4	1034	0.00386847	No	C
193200	G	T	intergenic	SNP	2	1034	0.00193424	No	NA
193222	T	G	intergenic	SNP	1	1034	0.000967118	SRR1946324	NA
193486	T	A	intergenic	SNP	3	1034	0.00290135	No	T
193507	C	A	intergenic	SNP	1	1034	0.000967118	SRR1945758	C
193964	G	T	intergenic	SNP	1	1034	0.000967118	SRR1946436	G
194038	C	A	intergenic	SNP	1	1034	0.000967118	SRR1946117	C
194077	G	A	intergenic	SNP	1	1034	0.000967118	SRR1946424	G
194309	T	A	intergenic	SNP	43	1033	0.0416263	No	NA
198320	C	G	intergenic	SNP	1	1031	0.000969932	SRR1945786	NA
198588	G	A	intergenic	SNP	1	1033	0.000968054	SRR1945804	NA
198665	G	T	intergenic	SNP	1	1033	0.000968054	SRR1946424	NA
198981	C	G	intergenic	SNP	1	1034	0.000967118	SRR1946324	NA
199140	C	A	intergenic	SNP	22	1034	0.0212766	No	NA
199443	C	T	intergenic	SNP	1	1034	0.000967118	SRR1946296	NA
199612	C	A	intergenic	SNP	1	1034	0.000967118	SRR1946237	NA
200064	A	AT	intergenic	Indel	1	958	0.00104384	SRR1946324	NA
200266	C	A	intergenic	SNP	2	1010	0.0019802	No	NA
200580	G	T	intergenic	SNP	1	1033	0.000968054	SRR1946391	NA
200987	C	A	intergenic	SNP	102	1034	0.098646	No	NA
201106	GATAA	G	intergenic	Indel	1	1034	0.000967118	SRR1946340	NA
201155	C	A	intergenic	SNP	10	1033	0.00968054	No	NA
201253	C	A	intergenic	SNP	4	1029	0.00388727	No	NA
201672	C	A	intergenic	SNP	4	1006	0.00397614	No	NA
201748	TCG	T	intergenic	Indel	2	1021	0.00195886	No	NA
201749	CG	C	intergenic	Indel	2	1021	0.00195886	No	NA
201911	C	A	intergenic	SNP	1	1034	0.000967118	SRR1945754	NA
202350	C	A	intergenic	SNP	1	1034	0.000967118	SRR1946161	NA
202932	A	AATCCC	intergenic	Indel	1	1034	0.000967118	SRR1946324	NA
204016	C	T	intergenic	SNP	1	1034	0.000967118	SRR1945994	NA
204461	G	A	intergenic	SNP	1	1034	0.000967118	SRR1946309	NA
204502	G	A	intergenic	SNP	3	1033	0.00290416	No	NA
204659	G	T	intergenic	SNP	634	1034	0.386847	No	NA
204660	A	C	intergenic	SNP	634	1034	0.386847	No	NA
204823	G	T	intergenic	SNP	1	1033	0.000968054	SRR1946401	NA
205906	A	C	intergenic	SNP	1	1034	0.000967118	SRR1946324	NA
206628	C	T	intergenic	SNP	1	1027	0.00097371	SRR1946369	NA
206630	G	T	intergenic	SNP	1	1027	0.00097371	SRR1946369	NA
206635	C	T	intergenic	SNP	1	1028	0.000972763	SRR1946369	NA
207382	T	G	intergenic	SNP	2	1034	0.00193424	No	NA
207395	G	A	intergenic	SNP	3	1034	0.00290135	No	NA
207438	C	T	intergenic	SNP	3	1033	0.00290416	No	NA
207910	G	A	intron	SNP	17	1016	0.0167323	No	G
208079	G	C	intron	SNP	1	997	0.00100301	SRR1946171	G
208819	GGTTCT	G	intron	Indel	1	752	0.00132979	SRR1946286	NA
210157	T	G	intron	SNP	1	1020	0.000980392	SRR1945739	T
210178	AC	A	intron	Indel	32	932	0.0343348	No	NA
210178	A	AC	intron	Indel	32	932	0.0343348	No	NA
210268	C	G	intron	SNP	1	1011	0.00098912	SRR1945994	C
210612	G	T	intron	SNP	2	930	0.00215054	No	G
210613	G	C	intron	SNP	2	938	0.0021322	No	G
210614	A	C	intron	SNP	2	943	0.00212089	No	A
211357	C	G	intron	SNP	1	1026	0.000974659	SRR1946035	C
212546	C	A	intron	SNP	1	1003	0.000997009	SRR1946237	-
212568	C	A	intron	SNP	1	1006	0.000994036	SRR1946429	C
212692	C	A	intron	SNP	27	1027	0.0262902	No	C
212820	G	T	intron	SNP	7	955	0.00732984	No	G
213974	C	T	intron	SNP	1	1006	0.000994036	SRR1946195	C
214072	A	G	intron	SNP	1	1018	0.000982318	SRR1946041	A
214158	G	T	intron	SNP	1	1012	0.000988142	SRR1946324	T
215225	C	A	coding (nonsynonymous; AGA/ATA; nad4)	SNP	1	1034	0.000967118	SRR1946241	C
216183	C	T	intergenic	SNP	3	1030	0.00291262	No	C
216325	G	A	intergenic	SNP	1	887	0.0011274	SRR1945822	G
216808	T	C	intergenic	SNP	94	1034	0.0909091	No	T
217174	A	C	intergenic	SNP	1	1022	0.000978474	SRR1946120	A
217252	C	A	intergenic	SNP	6	1034	0.00580271	No	A
217499	G	T	intergenic	SNP	1	1014	0.000986193	SRR1945999	G
217574	C	A	intergenic	SNP	5	946	0.00528541	No	C
217646	C	T	intergenic	SNP	1	994	0.00100604	SRR1946388	C
217835	A	G	intergenic	SNP	942	982	0.0407332	No	G
218028	TAA	T	intergenic	Indel	1	1034	0.000967118	SRR1945859	NA
218104	G	A	intergenic	SNP	12	1034	0.0116054	No	G
218109	G	A	intergenic	SNP	12	1034	0.0116054	No	G
219722	C	A	coding (nonsynonymous; GAA/TAA; mttB)	SNP	10	1032	0.00968992	No	C
220451	G	A	intron	SNP	7	1025	0.00682927	No	G
220498	G	T	intron	SNP	27	1029	0.0262391	No	G
220746	CACCAAT	C	intron	Indel	1	1034	0.000967118	SRR1946391	NA
220888	C	CCTTAT	intron	Indel	1	1033	0.000968054	SRR1946182	NA
221569	C	T	intron	SNP	2	954	0.00209644	No	C
221729	C	T	coding (synonymous; GCG/GCA; rpl2)	SNP	1	1019	0.000981354	SRR1946397	C
222371	C	A	coding (nonsynonymous; CAG/CAT; rpl2)	SNP	2	1022	0.00195695	No	C
222682	C	CCTTA	intergenic	Indel	2	1014	0.00197239	No	NA
222751	G	A	intergenic	SNP	3	794	0.00377834	No	G
222969	C	A	intergenic	SNP	1	805	0.00124224	SRR1946301	NA
223868	TC	T	intergenic	Indel	1	632	0.00158228	SRR1946466	NA
223869	CA	C	intergenic	Indel	2	535	0.00373832	No	NA
223870	AC	A	intergenic	Indel	504	217	-1.32258	No	NA
223870	ACC	A	intergenic	Indel	15	217	0.0691244	No	NA
223871	C	A	intergenic	SNP	1	22	0.0454545	SRR1946466	NA
223935	G	T	intergenic	SNP	1	985	0.00101523	SRR1945859	NA
224005	C	T	intergenic	SNP	1	991	0.00100908	SRR1945881	NA
224047	C	G	intergenic	SNP	1	1018	0.000982318	SRR1945813	NA
224169	C	T	intergenic	SNP	1	1030	0.000970874	SRR1945765	NA
224739	G	C	intergenic	SNP	8	1033	0.00774443	No	NA
225465	G	T	intergenic	SNP	1	1031	0.000969932	SRR1946324	NA
225625	G	A	intergenic	SNP	11	1034	0.0106383	No	NA
225877	T	G	intergenic	SNP	1	1034	0.000967118	SRR1946148	NA
225878	C	A	intergenic	SNP	1	1034	0.000967118	SRR1946148	NA
226148	C	T	intergenic	SNP	1	1034	0.000967118	SRR1946183	NA
227170	A	C	intergenic	SNP	1	1020	0.000980392	SRR1946324	NA
227278	C	A	intergenic	SNP	19	863	0.0220162	No	NA
227303	G	T	intergenic	SNP	3	930	0.00322581	No	NA
227404	C	A	intergenic	SNP	1	1034	0.000967118	SRR1946324	NA
227705	T	G	intergenic	SNP	15	1033	0.0145208	No	T
228659	G	T	intergenic	SNP	99	1032	0.0959302	No	NA
228916	C	A	intergenic	SNP	15	973	0.0154162	No	NA
229019	G	A	intergenic	SNP	219	1032	0.212209	No	NA
229217	G	A	intergenic	SNP	6	1034	0.00580271	No	NA
229293	G	A	intergenic	SNP	1	1034	0.000967118	SRR1946126	NA
229837	G	T	intergenic	SNP	2	1030	0.00194175	No	NA
229935	C	A	intergenic	SNP	1	1033	0.000968054	SRR1945739	C
230087	G	T	intergenic	SNP	6	1009	0.00594648	No	G
230187	C	A	intergenic	SNP	2	1029	0.00194363	No	C
230556	AG	A	intron	Indel	2	688	0.00290698	No	NA
230556	A	AG	intron	Indel	6	688	0.00872093	No	NA
230588	C	A	intron	SNP	8	906	0.00883002	No	C
231337	C	A	coding (synonymous; GTC/GTA; matR)	SNP	109	1032	0.10562	No	C
231522	G	T	coding (nonsynonymous; CGT/CTT; matR)	SNP	2	1024	0.00195312	No	G
232210	A	G	coding (synonymous; CGA/CGG; matR)	SNP	6	1021	0.00587659	No	A
232606	C	T	coding (synonymous; CAC/CAT; matR)	SNP	1	739	0.00135318	SRR1945785	C
232970	G	T	coding (nonsynonymous; GCA/TCA; matR)	SNP	1	1032	0.000968992	SRR1946128	G
233436	TTATA	T	intron	Indel	1	637	0.00156986	SRR1945822	NA
233598	GAATC	G	intron	Indel	279	937	0.297759	No	NA
234205	C	A	intergenic	SNP	1	1004	0.000996016	SRR1946329	A
234309	A	C	intergenic	SNP	388	1017	0.381514	No	C
235060	C	A	intron	SNP	79	991	0.0797175	No	C
235802	C	A	coding (nonsynonymous; TCT/TAT; nad5)	SNP	1	1033	0.000968054	SRR1946324	C
237022	C	T	intergenic	SNP	1	777	0.001287	SRR1945920	C
237065	GC	G	intergenic	Indel	120	217	0.447005	No	NA
237065	GCC	G	intergenic	Indel	80	217	0.368664	No	NA
237564	T	G	intergenic	SNP	1	1030	0.000970874	SRR1946324	G
237606	G	T	intergenic	SNP	20	1032	0.0193798	No	NA
238392	A	T	intergenic	SNP	20	1031	0.0193986	No	NA
238634	G	T	intergenic	SNP	2	1034	0.00193424	No	G
238639	C	A	intergenic	SNP	1	1034	0.000967118	SRR1945728	C
238885	C	A	intergenic	SNP	20	1034	0.0193424	No	C
240033	GAT	G	intron	Indel	2	766	0.00261097	No	NA
240033	GATAT	G	intron	Indel	11	766	0.0143603	No	NA
240033	G	GATAT	intron	Indel	1	766	0.00130548	SRR1945523	NA
240308	G	A	intron	SNP	3	1028	0.00291829	No	G
240440	G	C	intron	SNP	96	1028	0.0933852	No	G
240458	G	A	intron	SNP	1	1029	0.000971817	SRR1946294	G
241116	C	T	intron	SNP	68	817	0.0832313	No	C
241218	G	A	intron	SNP	1	999	0.001001	SRR1945758	G
241302	G	A	intron	SNP	1	1021	0.000979432	SRR1946170	G
241784	C	T	intron	SNP	1	773	0.00129366	SRR1945994	C
242053	C	A	intron	SNP	1	1004	0.000996016	SRR1945874	C
243504	G	T	intron	SNP	289	1009	0.286422	No	G
243645	C	T	intron	SNP	7	1013	0.00691017	No	C
244217	C	A	coding (synonymous; GGG/GGT; nad7)	SNP	1	928	0.00107759	SRR1946450	C
244442	G	T	intron	SNP	61	964	0.063278	No	G
244492	C	A	intron	SNP	14	872	0.016055	No	C
244710	C	A	intron	SNP	116	953	0.121721	No	C
245345	G	T	intergenic	SNP	7	979	0.00715015	No	G
245542	G	A	intergenic	SNP	1	358	0.0027933	SRR1946324	A
245585	G	T	intergenic	SNP	1	832	0.00120192	SRR1946387	G
245715	A	G	intergenic	SNP	2	922	0.0021692	No	A
245817	C	A	intergenic	SNP	3	999	0.003003	No	C
246009	C	A	intergenic	SNP	3	1034	0.00290135	No	C
246308	C	T	intergenic	SNP	3	1034	0.00290135	No	C
246380	G	T	intergenic	SNP	102	1034	0.098646	No	G
246395	G	T	intergenic	SNP	1	1034	0.000967118	SRR1946117	G
247708	G	T	intergenic	SNP	2	942	0.00212314	No	G
247923	G	T	intergenic	SNP	1	1034	0.000967118	SRR1946161	G
248216	C	T	intergenic	SNP	1	749	0.00133511	SRR1946424	NA
248489	T	G	intergenic	SNP	1	864	0.00115741	SRR1946232	NA
248644	C	A	intergenic	SNP	94	977	0.0962129	No	NA
248720	G	T	intergenic	SNP	1	1031	0.000969932	SRR1946324	NA
248878	A	C	intergenic	SNP	1	1033	0.000968054	SRR1945994	NA
249092	C	A	intergenic	SNP	1	1033	0.000968054	SRR1946306	NA
249158	C	A	intergenic	SNP	2	1032	0.00193798	No	NA
249278	TA	T	intergenic	Indel	16	1030	0.015534	No	NA
249325	C	T	intergenic	SNP	1	1030	0.000970874	SRR1946391	NA
249416	AGCTAC	A	intergenic	Indel	1	1034	0.000967118	SRR1945829	NA
249538	A	C	intergenic	SNP	1	1033	0.000968054	SRR1946324	NA
249549	G	T	intergenic	SNP	87	1033	0.0842207	No	NA
249648	C	G	intergenic	SNP	6	1029	0.0058309	No	NA
249685	GGCTGCGCCTTCT	G	intergenic	Indel	1	936	0.00106838	SRR1946400	NA
250089	G	A	intergenic	SNP	1	413	0.00242131	SRR1946117	G
250162	T	TTATC	intergenic	Indel	1	554	0.00180505	SRR1946410	NA
250619	C	A	intergenic	SNP	11	1032	0.0106589	No	C
250633	G	A	intergenic	SNP	1	1032	0.000968992	SRR1946211	G
250838	C	A	intergenic	SNP	2	1032	0.00193798	No	NA
250914	G	T	intergenic	SNP	3	1031	0.0029098	No	NA
250921	T	G	intergenic	SNP	1	1029	0.000971817	SRR1946153	NA
251348	G	T	intergenic	SNP	1	1023	0.000977517	SRR1946140	NA
251859	C	T	intergenic	SNP	102	1027	0.0993184	No	NA
252151	C	T	intergenic	SNP	24	1027	0.023369	No	NA
252156	G	A	intergenic	SNP	1	1027	0.00097371	SRR1945810	NA
252156	G	T	intergenic	SNP	1	1027	0.00097371	SRR1945810	NA
252215	G	T	intergenic	SNP	4	1027	0.00389484	No	NA
252383	C	A	intergenic	SNP	1	1026	0.000974659	SRR1945661	C
253017	T	G	intergenic	SNP	1	1026	0.000974659	SRR1946324	NA
253111	ATATAC	A	intergenic	Indel	1	1026	0.000974659	SRR1946281	NA
253160	G	T	intergenic	SNP	266	1022	0.260274	No	NA
253174	G	T	intergenic	SNP	1	1019	0.000981354	SRR1946242	NA
253181	A	C	intergenic	SNP	1	1020	0.000980392	SRR1946415	NA
253470	C	A	intergenic	SNP	2	869	0.0023015	No	NA
253514	C	T	intergenic	SNP	3	973	0.00308325	No	NA
253518	C	T	intergenic	SNP	22	972	0.0226337	No	NA
253570	C	A	intergenic	SNP	1	1016	0.000984252	SRR1946432	NA
253826	C	T	intergenic	SNP	11	1025	0.0107317	No	NA
254000	G	T	intergenic	SNP	1	1018	0.000982318	SRR1946141	NA
254240	A	C	intergenic	SNP	1	1018	0.000982318	SRR1946330	NA
254533	C	A	intergenic	SNP	1	1023	0.000977517	SRR1946318	NA
254600	C	A	intergenic	SNP	270	1026	0.263158	No	NA
254630	G	T	intergenic	SNP	136	1025	0.132683	No	NA
254633	T	G	intergenic	SNP	10	1025	0.0097561	No	NA
254637	C	A	intergenic	SNP	1	1025	0.00097561	SRR1946239	NA
254664	T	G	intergenic	SNP	1	1024	0.000976562	SRR1945889	NA
254671	A	T	intergenic	SNP	1	1024	0.000976562	SRR1946324	NA
254857	C	A	intergenic	SNP	1	1023	0.000977517	SRR1946104	NA
255052	T	C	intergenic	SNP	1	526	0.00190114	SRR1946324	NA
255200	C	T	intergenic	SNP	16	518	0.030888	No	NA
255798	C	T	intergenic	SNP	1	521	0.00191939	SRR1946108	NA
255869	AC	A	intergenic	Indel	5	522	0.00957854	No	NA
256029	C	CAGGAAGAGTCTCGACTAAAAGGAG	intergenic	Indel	4	510	0.00784314	No	NA
256209	T	G	intergenic	SNP	1	501	0.00199601	SRR1946324	NA
256304	AAAAGC	A	intergenic	Indel	1	500	0.002	SRR1945773	NA
256304	A	AAAAGC	intergenic	Indel	8	500	0.016	No	NA
256704	C	A	intergenic	SNP	236	499	0.472946	No	NA
256787	T	G	intergenic	SNP	105	500	0.21	No	NA
256888	G	T	intergenic	SNP	1	499	0.00200401	SRR1946108	NA
257115	C	A	intergenic	SNP	3	499	0.00601202	No	NA
257512	GGCTATAAGC	G	intergenic	Indel	1	509	0.00196464	SRR1946237	NA
257620	T	G	intergenic	SNP	9	510	0.0176471	No	NA
257786	C	A	intergenic	SNP	4	521	0.00767754	No	NA
257878	T	C	intergenic	SNP	1	495	0.0020202	SRR1946324	NA
257879	G	GAAGA	intergenic	Indel	51	495	0.10303	No	NA
257879	G	T	intergenic	SNP	1	495	0.0020202	SRR1945475	NA
257880	A	C	intergenic	SNP	1	495	0.0020202	SRR1946324	NA
257966	G	T	intergenic	SNP	1	494	0.00202429	SRR1946324	NA
258028	A	AAGCGTTGTT	intergenic	Indel	78	466	0.167382	No	NA
258144	G	GAATT	intergenic	Indel	1	484	0.00206612	SRR1945860	NA
258187	G	T	intergenic	SNP	1	492	0.00203252	SRR1946435	NA
258188	A	T	intergenic	SNP	1	492	0.00203252	SRR1946435	NA
258192	C	G	intergenic	SNP	1	495	0.0020202	SRR1946435	NA
258215	C	CAA	intergenic	Indel	1	497	0.00201207	SRR1946429	NA
258219	C	T	intergenic	SNP	1	497	0.00201207	SRR1946429	NA
258220	TGA	T	intergenic	Indel	1	497	0.00201207	SRR1946429	NA
258359	T	A	intergenic	SNP	1	495	0.0020202	SRR1946321	NA
258360	C	A	intergenic	SNP	1	495	0.0020202	SRR1946321	NA
258520	C	T	intergenic	SNP	15	497	0.0301811	No	NA
265279	C	T	coding (nonsynonymous; GAA/AAA; atp6-2)	SNP	34	444	0.0765766	No	NA
265451	C	A	coding (synonymous; GTG/GTT; atp6-2)	SNP	2	463	0.00431965	No	NA
265538	T	C	intergenic	SNP	34	468	0.0726496	No	NA
265543	C	A	intergenic	SNP	34	467	0.0728051	No	NA
265565	G	C	intergenic	SNP	8	471	0.0169851	No	NA
265578	T	G	intergenic	SNP	34	473	0.0718816	No	NA
265580	A	T	intergenic	SNP	34	473	0.0718816	No	NA
265596	G	T	intergenic	SNP	2	476	0.00420168	No	NA
265618	G	T	intergenic	SNP	1	479	0.00208768	SRR1946321	NA
265803	A	G	intergenic	SNP	1	478	0.00209205	SRR1946307	NA
265820	G	GA	intergenic	Indel	1	479	0.00208768	SRR1946471	NA
265823	C	A	intergenic	SNP	1	480	0.00208333	SRR1946471	NA
266162	A	C	intergenic	SNP	2	500	0.004	No	C
266194	C	A	intergenic	SNP	1	502	0.00199203	SRR1946243	C
266630	C	T	intergenic	SNP	1	502	0.00199203	SRR1945879	C
266902	A	G	intergenic	SNP	1	503	0.00198807	SRR1945994	G
267165	G	A	intergenic	SNP	1	502	0.00199203	SRR1946232	G
267179	T	C	intergenic	SNP	2	502	0.00398406	No	C
267260	GA	G	intergenic	Indel	159	503	0.316103	No	NA
267617	ACAGT	A	intergenic	Indel	2	503	0.00397614	No	NA
267760	C	G	intergenic	SNP	1	503	0.00198807	SRR1945879	C
267800	T	G	intergenic	SNP	1	503	0.00198807	SRR1945994	G
267812	A	G	intergenic	SNP	1	503	0.00198807	SRR1945994	A
267832	G	A	intergenic	SNP	1	503	0.00198807	SRR1946237	G
268095	A	T	intergenic	SNP	1	503	0.00198807	SRR1945887	A
268195	C	A	intergenic	SNP	1	503	0.00198807	SRR1946041	C
268239	C	T	intergenic	SNP	8	503	0.0159046	No	C
268459	G	A	intergenic	SNP	1	503	0.00198807	SRR1945994	G
268487	T	C	intergenic	SNP	1	503	0.00198807	SRR1945994	C
268608	C	T	intergenic	SNP	2	503	0.00397614	No	T
268849	C	T	intergenic	SNP	1	503	0.00198807	SRR1946195	C
268976	A	AGACT	intergenic	Indel	1	503	0.00198807	SRR1945994	NA
269083	T	G	intergenic	SNP	1	503	0.00198807	SRR1945994	NA
269650	T	G	intergenic	SNP	383	467	0.179872	No	NA
269749	C	T	intergenic	SNP	6	460	0.0130435	No	NA
269898	C	G	intergenic	SNP	1	486	0.00205761	SRR1946324	NA
269934	C	T	intergenic	SNP	1	490	0.00204082	SRR1946457	NA
270093	T	A	intergenic	SNP	1	505	0.0019802	SRR1946457	NA
270446	G	T	intergenic	SNP	3	564	0.00531915	No	NA
271078	C	A	coding (synonymous; GCG/GCT; atp9)	SNP	3	1032	0.00290698	No	C
271090	A	G	coding (synonymous; ATT/ATC; atp9)	SNP	4	1034	0.00386847	No	G
271490	A	G	intergenic	SNP	2	1032	0.00193798	No	A
271544	GGATACATAC	G	intergenic	Indel	12	1033	0.0116167	No	NA
271575	A	C	intergenic	SNP	1	1032	0.000968992	SRR1945829	NA
271893	A	G	intergenic	SNP	4	1033	0.00387222	No	NA
272087	C	G	intergenic	SNP	1	1034	0.000967118	SRR1946195	NA
272177	C	A	intergenic	SNP	3	1034	0.00290135	No	NA
272476	C	A	intergenic	SNP	1	1034	0.000967118	SRR1946120	NA
272706	C	A	intergenic	SNP	1	1034	0.000967118	SRR1946324	NA
273289	C	G	intergenic	SNP	13	1034	0.0125725	No	NA
273340	T	G	intergenic	SNP	2	1031	0.00193986	No	NA
273803	TTTG	T	intergenic	Indel	1	1032	0.000968992	SRR1946237	NA
274272	G	A	intergenic	SNP	1	1013	0.000987167	SRR1945850	NA
274475	G	T	intergenic	SNP	1	1034	0.000967118	SRR1946305	NA
274558	G	C	intergenic	SNP	1	1034	0.000967118	SRR1946323	NA
275058	C	A	intergenic	SNP	83	1011	0.0820969	No	NA
275464	A	G	intergenic	SNP	1	1033	0.000968054	SRR1945881	NA
276635	T	C	intergenic	SNP	1	942	0.00106157	SRR1946324	NA
276698	C	A	intergenic	SNP	2	1030	0.00194175	No	NA
277102	C	T	intergenic	SNP	1	1026	0.000974659	SRR1946432	NA
277171	C	T	intergenic	SNP	1	1028	0.000972763	SRR1946457	NA
277209	C	A	intergenic	SNP	1	1031	0.000969932	SRR1946251	NA
277283	C	T	intergenic	SNP	262	1031	0.254122	No	NA
277515	C	G	intergenic	SNP	1	1027	0.00097371	SRR1946443	NA
277740	T	C	intergenic	SNP	2	1033	0.00193611	No	T
277751	G	A	intergenic	SNP	5	1034	0.00483559	No	G
277985	C	T	intergenic	SNP	3	1032	0.00290698	No	C
278277	G	A	intergenic	SNP	10	1034	0.00967118	No	NA
278439	G	T	intergenic	SNP	1	1026	0.000974659	SRR1946236	NA
278466	T	G	intergenic	SNP	95	1026	0.0925926	No	NA
278678	G	T	intergenic	SNP	123	1024	0.120117	No	NA
280000	G	T	intergenic	SNP	3	1033	0.00290416	No	NA
280073	G	A	intergenic	SNP	19	1033	0.018393	No	NA
280379	CATTT	C	intergenic	Indel	3	1031	0.0029098	No	NA
280431	C	A	intergenic	SNP	1	1031	0.000969932	SRR1945755	NA
280886	C	A	intergenic	SNP	3	1033	0.00290416	No	NA
281616	C	CGAGGAACGCCAGTTAGTCGACTAAAGGGA	intergenic	Indel	1	1033	0.000968054	SRR1946157	NA
281837	C	A	intergenic	SNP	30	1033	0.0290416	No	NA
282004	C	A	intergenic	SNP	1	1033	0.000968054	SRR1946432	NA
282433	G	A	intergenic	SNP	1	1033	0.000968054	SRR1946109	G
282549	C	T	intergenic	SNP	1	1033	0.000968054	SRR1945734	C
282740	G	T	intergenic	SNP	1	1033	0.000968054	SRR1946003	T
283224	G	T	intergenic	SNP	2	1033	0.00193611	No	G
283759	G	A	intergenic	SNP	6	998	0.00601202	No	G
284122	C	A	intergenic	SNP	2	1033	0.00193611	No	C
284210	A	C	intergenic	SNP	1	1033	0.000968054	SRR1945987	A
284267	A	C	intergenic	SNP	1	1031	0.000969932	SRR1946118	NA
284271	A	G	intergenic	SNP	1	1031	0.000969932	SRR1946118	NA
284277	A	G	intergenic	SNP	1	1032	0.000968992	SRR1946118	NA
284282	C	T	intergenic	SNP	1	1032	0.000968992	SRR1946118	NA
284461	TGTAAAACAGAGC	T	intergenic	Indel	1	1033	0.000968054	SRR1946282	NA
284558	G	C	intergenic	SNP	1	1033	0.000968054	SRR1946108	NA
285646	G	T	intergenic	SNP	1	1032	0.000968992	SRR1945979	G
286207	C	A	intergenic	SNP	1	1033	0.000968054	SRR1946175	C
286797	T	G	intergenic	SNP	1	1032	0.000968992	SRR1945758	NA
286798	G	A	intergenic	SNP	1	1032	0.000968992	SRR1945758	NA
286970	G	T	intergenic	SNP	1	1033	0.000968054	SRR1946330	NA
287127	C	A	intergenic	SNP	95	1028	0.0924125	No	NA
287199	G	C	intergenic	SNP	1	984	0.00101626	SRR1946346	NA
287200	G	T	intergenic	SNP	1	983	0.00101729	SRR1946346	NA
287270	C	G	intergenic	SNP	1	952	0.00105042	SRR1946324	NA
287302	C	T	intergenic	SNP	1	928	0.00107759	SRR1946324	NA
287484	C	A	intergenic	SNP	1	916	0.0010917	SRR1946441	NA
287612	G	A	intergenic	SNP	1	929	0.00107643	SRR1946324	NA
287615	A	C	intergenic	SNP	1	917	0.00109051	SRR1946324	NA
287670	G	C	intergenic	SNP	1	942	0.00106157	SRR1946324	NA
287687	G	C	intergenic	SNP	1	955	0.00104712	SRR1946324	NA
287715	C	G	intergenic	SNP	1	951	0.00105152	SRR1946324	NA
287795	G	A	intergenic	SNP	1	603	0.00165837	SRR1946324	NA
287813	G	A	intergenic	SNP	1	695	0.00143885	SRR1946324	NA
287861	G	T	intergenic	SNP	1	754	0.00132626	SRR1946324	NA
288308	C	T	coding (synonymous; CTG/TTG; nad3)	SNP	4	981	0.00407747	No	NA
288424	G	GA	intergenic	Indel	4	1019	0.00392542	No	NA
289242	G	T	intergenic	SNP	1	1034	0.000967118	SRR1946402	NA
289361	C	A	intergenic	SNP	6	1033	0.00580833	No	NA
289538	G	T	intergenic	SNP	1	1034	0.000967118	SRR1946296	NA
289591	G	T	intergenic	SNP	2	1034	0.00193424	No	NA
291352	T	G	intergenic	SNP	636	1034	0.384913	No	NA
292328	G	A	intergenic	SNP	2	994	0.00201207	No	G
292911	TAC	T	intergenic	Indel	1	1034	0.000967118	SRR1946429	NA
292966	C	T	intergenic	SNP	6	1034	0.00580271	No	C
293363	TTTTC	T	intergenic	Indel	1015	1034	0.0183752	No	NA
293409	C	A	intergenic	SNP	1	1034	0.000967118	SRR1945680	C
293585	G	T	intergenic	SNP	1	958	0.00104384	SRR1945813	G
293610	C	A	intergenic	SNP	40	855	0.0467836	No	C
293904	G	A	intergenic	SNP	2	1002	0.00199601	No	G
294205	G	A	intergenic	SNP	1	975	0.00102564	SRR1946282	G
294212	AGCCAACG	A	intergenic	Indel	1	978	0.00102249	SRR1946324	NA
294250	G	A	intergenic	SNP	106	998	0.106212	No	G
295632	C	T	intergenic	SNP	1	1032	0.000968992	SRR1946296	NA
296090	G	A	intergenic	SNP	1	1026	0.000974659	SRR1946331	NA
296543	G	C	intergenic	SNP	107	1031	0.103783	No	NA
296581	AAACT	A	intergenic	Indel	1	1020	0.000980392	SRR1946324	NA
297788	G	GAAGCA	intergenic	Indel	1	1034	0.000967118	SRR1946474	NA
297812	T	G	intergenic	SNP	22	1032	0.0213178	No	NA
297813	C	A	intergenic	SNP	22	1032	0.0213178	No	NA
298022	TTC	T	intergenic	Indel	1	1032	0.000968992	SRR1945940	NA
298252	T	G	intergenic	SNP	661	1032	0.359496	No	G
298461	C	A	intergenic	SNP	102	1032	0.0988372	No	C
298673	G	A	intergenic	SNP	1	1025	0.00097561	SRR1946281	NA
298802	C	A	intergenic	SNP	4	945	0.0042328	No	NA
298849	TA	T	intergenic	Indel	1	855	0.00116959	SRR1945932	NA
298849	T	TA	intergenic	Indel	6	855	0.00701754	No	NA
299092	A	G	intergenic	SNP	1	1011	0.00098912	SRR1946137	NA
299125	G	T	intergenic	SNP	1	1013	0.000987167	SRR1946296	NA
299487	G	C	intergenic	SNP	1002	1016	0.0137795	No	NA
299508	C	A	intergenic	SNP	2	1020	0.00196078	No	NA
299967	C	T	intergenic	SNP	1	1031	0.000969932	SRR1946424	NA
300503	A	G	intergenic	SNP	1	1033	0.000968054	SRR1945881	NA
301185	G	A	intergenic	SNP	1	1028	0.000972763	SRR1946129	G
301413	C	A	intergenic	SNP	1	1034	0.000967118	SRR1945584	NA
301874	C	CGGAGAGGAACGCCTACTACTCGACTAATA	intergenic	Indel	2	1034	0.00193424	No	NA
302487	G	GAAAGC	intergenic	Indel	1	1034	0.000967118	SRR1946324	NA
303563	C	CT	intergenic	Indel	1	1025	0.00097561	SRR1946125	NA
303898	C	A	intergenic	SNP	22	1033	0.0212972	No	NA
304180	C	A	intergenic	SNP	1	1022	0.000978474	SRR1946402	NA
304263	C	A	intergenic	SNP	163	998	0.163327	No	NA
304402	G	T	intergenic	SNP	3	1016	0.00295276	No	NA
304720	G	T	intergenic	SNP	1	1016	0.000984252	SRR1946436	NA
305197	C	A	intergenic	SNP	1	1033	0.000968054	SRR1946182	NA
305455	G	A	intergenic	SNP	1	1034	0.000967118	SRR1946077	NA
305943	C	A	intergenic	SNP	18	956	0.0188285	No	NA
306510	C	T	intergenic	SNP	2	1033	0.00193611	No	NA
306642	G	T	intergenic	SNP	17	1034	0.016441	No	NA
306901	G	A	intergenic	SNP	1	1031	0.000969932	SRR1945739	NA
306990	C	A	intergenic	SNP	56	1032	0.0542636	No	NA
307081	A	G	intergenic	SNP	457	1028	0.444553	No	NA
307086	G	T	intergenic	SNP	2	1029	0.00194363	No	NA
307107	C	T	intergenic	SNP	608	1034	0.411992	No	NA
307110	G	A	intergenic	SNP	614	1034	0.40619	No	NA
307111	T	G	intergenic	SNP	616	1034	0.404255	No	NA
307112	T	C	intergenic	SNP	617	1034	0.403288	No	NA
307268	C	A	intergenic	SNP	218	1031	0.211445	No	NA
307291	A	G	intergenic	SNP	659	1032	0.361434	No	NA
307317	G	A	intergenic	SNP	167	1031	0.161979	No	NA
307317	G	C	intergenic	SNP	633	1031	0.386033	No	NA
307333	A	C	intergenic	SNP	659	1032	0.361434	No	NA
307658	A	G	intergenic	SNP	488	1008	0.484127	No	NA
307674	C	A	intergenic	SNP	20	913	0.0219058	No	NA
307741	G	C	intergenic	SNP	356	400	0.11	No	NA
307752	A	G	intergenic	SNP	138	398	0.346734	No	NA
307774	A	G	intergenic	SNP	3	397	0.00755668	No	NA
307776	T	G	intergenic	SNP	15	398	0.0376884	No	NA
307813	A	C	intergenic	SNP	10	597	0.0167504	No	NA
307824	T	C	intergenic	SNP	2	802	0.00249377	No	NA
307830	T	C	intergenic	SNP	2	890	0.00224719	No	NA
307833	C	G	intergenic	SNP	2	899	0.00222469	No	NA
307834	C	T	intergenic	SNP	2	901	0.00221976	No	NA
307836	G	T	intergenic	SNP	2	915	0.00218579	No	NA
307864	G	A	intergenic	SNP	404	997	0.405216	No	NA
308134	C	A	intergenic	SNP	16	1031	0.0155189	No	A
308214	G	T	intergenic	SNP	6	1031	0.00581959	No	-
308760	C	T	coding (nonsynonymous; CGT/TGT; ccmC)	SNP	267	1034	0.258221	No	C
309328	C	A	intergenic	SNP	298	1033	0.28848	No	NA
309338	C	A	intergenic	SNP	1	1033	0.000968054	SRR1946059	NA
309806	T	C	intergenic	SNP	1	1034	0.000967118	SRR1946411	NA
309858	A	T	intergenic	SNP	1	1034	0.000967118	SRR1946213	NA
310126	A	G	intergenic	SNP	1	1034	0.000967118	SRR1946153	NA
310180	G	T	intergenic	SNP	2	1033	0.00193611	No	NA
310391	T	G	intergenic	SNP	1	1034	0.000967118	SRR1945822	NA
310714	C	A	intergenic	SNP	3	1033	0.00290416	No	NA
310829	CAATGT	C	intergenic	Indel	2	1033	0.00193611	No	NA
311282	G	A	intergenic	SNP	2	1034	0.00193424	No	NA
312176	G	T	intergenic	SNP	1	1033	0.000968054	SRR1946318	NA
312187	G	T	intergenic	SNP	1	1033	0.000968054	SRR1945813	NA
312369	G	A	intergenic	SNP	1	1034	0.000967118	SRR1946404	NA
312452	C	A	intergenic	SNP	3	1034	0.00290135	No	NA
312483	G	C	intergenic	SNP	637	1034	0.383946	No	NA
313426	T	G	intergenic	SNP	1	1032	0.000968992	SRR1946035	NA
313895	C	A	intergenic	SNP	1	1032	0.000968992	SRR1946117	NA
314097	C	T	intergenic	SNP	1	1033	0.000968054	SRR1946397	NA
314585	G	A	intergenic	SNP	92	1029	0.0894072	No	NA
314882	G	T	intergenic	SNP	320	1033	0.309777	No	NA
315398	C	T	intergenic	SNP	1	1033	0.000968054	SRR1946129	NA
316688	G	T	coding (nonsynonymous; GAC/TAC; ccmFN1)	SNP	2	1026	0.00194932	No	G
317607	T	A	intergenic	SNP	6	1032	0.00581395	No	T
317622	C	A	intergenic	SNP	1	1032	0.000968992	SRR1946148	T
317644	C	A	intergenic	SNP	2	1029	0.00194363	No	C
318547	G	A	intergenic	SNP	6	1034	0.00580271	No	G
318674	C	T	intergenic	SNP	7	1034	0.00676983	No	C
318819	A	T	intergenic	SNP	8	1034	0.00773694	No	A
318820	A	T	intergenic	SNP	8	1034	0.00773694	No	A
318821	A	T	intergenic	SNP	8	1034	0.00773694	No	A
319018	G	T	intergenic	SNP	80	1034	0.0773694	No	G
319069	G	A	intergenic	SNP	992	1034	0.040619	No	G
319991	G	A	intergenic	SNP	1	1034	0.000967118	SRR1946118	NA
320368	A	C	intergenic	SNP	1	1034	0.000967118	SRR1945859	NA
320382	C	A	intergenic	SNP	1	1034	0.000967118	SRR1946324	NA
320530	A	C	intergenic	SNP	1	1034	0.000967118	SRR1946239	NA
321031	G	T	intergenic	SNP	103	1034	0.0996132	No	NA
321535	G	A	pseudo	SNP	2	1034	0.00193424	No	NA
321562	C	A	intergenic	SNP	87	1034	0.0841393	No	NA
321658	C	T	intergenic	SNP	9	1032	0.00872093	No	NA
322017	G	A	intergenic	SNP	1	907	0.00110254	SRR1946474	NA
322167	G	T	intergenic	SNP	3	984	0.00304878	No	NA
322217	GA	G	intergenic	Indel	1	854	0.00117096	SRR1945445	NA
322217	G	GA	intergenic	Indel	7	854	0.00819672	No	NA
322217	G	T	intergenic	SNP	2	854	0.00234192	No	NA
322244	G	C	intergenic	SNP	1	934	0.00107066	SRR1945825	NA
322352	G	GC	intergenic	Indel	989	1010	0.0207921	No	NA
322404	C	A	intergenic	SNP	11	1033	0.0106486	No	NA
322638	T	C	intergenic	SNP	1	1034	0.000967118	SRR1945881	NA
322869	C	A	intergenic	SNP	1	1033	0.000968054	SRR1946420	NA
323131	A	G	intergenic	SNP	1	1034	0.000967118	SRR1945899	NA
323302	G	T	intergenic	SNP	137	1033	0.132623	No	NA
323364	C	T	intergenic	SNP	1	1032	0.000968992	SRR1946276	NA
323581	TA	T	intergenic	Indel	415	1033	0.401742	No	NA
323885	G	A	intergenic	SNP	267	1033	0.25847	No	NA
323989	C	G	intergenic	SNP	1	1032	0.000968992	SRR1946324	NA
324335	G	T	intergenic	SNP	2	1034	0.00193424	No	NA
324484	C	A	intergenic	SNP	7	1034	0.00676983	No	NA
324671	G	A	intergenic	SNP	15	1034	0.0145068	No	NA
325432	G	C	intergenic	SNP	2	1034	0.00193424	No	NA
325523	G	T	intergenic	SNP	6	1032	0.00581395	No	NA
326198	CATTAAA	C	intergenic	Indel	1	1033	0.000968054	SRR1946424	NA
326242	G	A	intergenic	SNP	1	1034	0.000967118	SRR1945600	G
326620	T	C	intergenic	SNP	1	1034	0.000967118	SRR1945491	T
326621	G	C	intergenic	SNP	1	1034	0.000967118	SRR1945491	G
326628	G	A	intergenic	SNP	19	1034	0.0183752	No	G
326664	G	C	intergenic	SNP	804	1034	0.222437	No	C
326694	C	A	intergenic	SNP	1	1034	0.000967118	SRR1946034	NA
326858	C	T	intergenic	SNP	1	1034	0.000967118	SRR1945994	NA
327801	C	T	intergenic	SNP	10	1034	0.00967118	No	NA
327827	C	A	intergenic	SNP	2	1032	0.00193798	No	NA
328784	CT	C	intergenic	Indel	1	1024	0.000976562	SRR1946118	NA
329482	T	C	intergenic	SNP	1	1026	0.000974659	SRR1946117	T
329526	A	C	intergenic	SNP	1	1020	0.000980392	SRR1946324	C
329580	A	G	intergenic	SNP	28	1029	0.0272109	No	A
329960	C	T	pseudo	SNP	1	1032	0.000968992	SRR1945739	C
330843	C	A	intergenic	SNP	2	894	0.00223714	No	C
331235	C	T	intergenic	SNP	482	944	0.489407	No	NA
331341	C	G	intergenic	SNP	2	950	0.00210526	No	NA
331576	C	G	intergenic	SNP	296	1031	0.2871	No	NA
332177	A	C	intergenic	SNP	6	560	0.0107143	No	NA
332179	G	T	intergenic	SNP	6	558	0.0107527	No	NA
332180	A	C	intergenic	SNP	6	557	0.010772	No	NA
332384	T	C	intergenic	SNP	2	780	0.0025641	No	NA
332386	T	G	intergenic	SNP	2	782	0.00255754	No	NA
332394	T	C	intergenic	SNP	3	789	0.00380228	No	NA
332395	C	T	intergenic	SNP	3	790	0.00379747	No	NA
332398	T	A	intergenic	SNP	3	790	0.00379747	No	NA
332409	G	A	intergenic	SNP	4	797	0.00501882	No	NA
332600	G	A	intergenic	SNP	6	914	0.00656455	No	NA
332701	A	G	intergenic	SNP	1	947	0.00105597	SRR1946432	NA
332703	A	G	intergenic	SNP	1	945	0.0010582	SRR1946432	NA
332706	C	T	intergenic	SNP	1	945	0.0010582	SRR1946432	NA
332941	A	T	intergenic	SNP	527	916	0.424672	No	NA
332950	C	A	intergenic	SNP	2	920	0.00217391	No	NA
333132	T	C	intergenic	SNP	1	979	0.00102145	SRR1945566	NA
333140	C	T	intergenic	SNP	2	981	0.00203874	No	NA
333167	T	C	intergenic	SNP	10	993	0.0100705	No	NA
333174	A	AAAAG	intergenic	Indel	12	995	0.0120603	No	NA
333207	T	G	intergenic	SNP	982	998	0.0160321	No	NA
334046	G	A	intergenic	SNP	2	1003	0.00199402	No	NA
334526	C	A	intergenic	SNP	1	1004	0.000996016	SRR1945739	NA
334607	G	T	intergenic	SNP	1	1004	0.000996016	SRR1945822	NA
334735	G	A	intergenic	SNP	1	1003	0.000997009	SRR1945923	NA
334851	C	T	intergenic	SNP	1	1003	0.000997009	SRR1945828	NA
334899	G	T	intergenic	SNP	1	1004	0.000996016	SRR1946141	NA
335229	C	T	intergenic	SNP	1	1005	0.000995025	SRR1945940	NA
336757	C	T	intergenic	SNP	3	1005	0.00298507	No	NA
336885	G	T	intergenic	SNP	2	1005	0.00199005	No	NA
336946	GCTCTCTTCTT	G	intergenic	Indel	1	1005	0.000995025	SRR1945659	NA
337499	C	A	intergenic	SNP	3	1005	0.00298507	No	NA
337596	G	A	intergenic	SNP	11	1002	0.010978	No	NA
337767	G	T	intergenic	SNP	95	975	0.0974359	No	NA
337890	G	A	intergenic	SNP	1	1003	0.000997009	SRR1946243	NA
337902	C	A	intergenic	SNP	1	1004	0.000996016	SRR1946104	NA
338385	A	AG	intergenic	Indel	4	1001	0.003996	No	NA
339123	C	A	intergenic	SNP	1	979	0.00102145	SRR1945894	NA
339190	AT	A	intergenic	Indel	1	966	0.0010352	SRR1945774	NA
339286	C	T	intergenic	SNP	7	856	0.00817757	No	NA
339766	A	AG	intergenic	Indel	1	849	0.00117786	SRR1946140	NA
339920	G	T	intergenic	SNP	1	1005	0.000995025	SRR1945999	NA
340120	G	GA	intergenic	Indel	1	1004	0.000996016	SRR1946046	NA
340261	G	A	intergenic	SNP	269	988	0.272267	No	NA
340673	A	T	intergenic	SNP	1	1004	0.000996016	SRR1946120	NA
340949	G	T	intergenic	SNP	1	1005	0.000995025	SRR1946396	NA
341213	T	A	intergenic	SNP	1	1002	0.000998004	SRR1946324	NA
341291	G	A	intergenic	SNP	1	1005	0.000995025	SRR1946043	NA
341704	C	A	intergenic	SNP	258	976	0.264344	No	NA
342280	T	C	intergenic	SNP	1	1005	0.000995025	SRR1945994	NA
342284	C	A	intergenic	SNP	1	1005	0.000995025	SRR1945994	NA
342285	T	C	intergenic	SNP	1	1005	0.000995025	SRR1945994	NA
342654	G	T	intergenic	SNP	1	1004	0.000996016	SRR1945734	NA
343145	G	A	intergenic	SNP	5	1006	0.00497018	No	NA
343645	C	A	intergenic	SNP	14	1006	0.0139165	No	NA
344037	T	G	intergenic	SNP	3	1012	0.00296443	No	NA
344257	G	T	intergenic	SNP	1	1011	0.00098912	SRR1946324	NA
344790	G	T	intergenic	SNP	16	1013	0.0157947	No	G
345808	G	T	intergenic	SNP	1	1012	0.000988142	SRR1945987	NA
345835	C	T	intergenic	SNP	23	1010	0.0227723	No	NA
346208	G	A	intergenic	SNP	7	1012	0.006917	No	NA
346646	G	A	pseudo	SNP	7	1011	0.00692384	No	NA
346716	T	C	intergenic	SNP	1	1009	0.00099108	SRR1945830	NA
346766	G	T	intergenic	SNP	5	980	0.00510204	No	NA
346767	A	C	intergenic	SNP	5	981	0.00509684	No	NA
347185	C	T	intergenic	SNP	1	958	0.00104384	SRR1946282	NA
347358	C	A	intergenic	SNP	16	1031	0.0155189	No	NA
347465	T	G	intergenic	SNP	21	1033	0.0203291	No	NA
347516	G	T	intergenic	SNP	2	1033	0.00193611	No	NA
349065	A	AGTAGT	intergenic	Indel	1	1030	0.000970874	SRR1945758	NA
349449	T	G	intergenic	SNP	1	1033	0.000968054	SRR1946389	NA
349517	C	T	intergenic	SNP	1	1034	0.000967118	SRR1946175	NA
349656	C	A	intergenic	SNP	2	1034	0.00193424	No	NA
350077	G	A	intergenic	SNP	1	1034	0.000967118	SRR1946387	NA
350432	G	A	intergenic	SNP	2	1032	0.00193798	No	NA
350675	G	T	intergenic	SNP	1	1031	0.000969932	SRR1946292	NA
351148	C	T	intergenic	SNP	3	1033	0.00290416	No	NA
351857	G	T	intergenic	SNP	1	1034	0.000967118	SRR1946237	NA
353037	C	T	intergenic	SNP	5	1034	0.00483559	No	NA
353487	C	T	intergenic	SNP	1	1033	0.000968054	SRR1945739	NA
354536	G	A	intergenic	SNP	1	1032	0.000968992	SRR1946436	NA
354685	TATAGAGAAGCCGTATGTTCTGCTA	T	intergenic	Indel	15	946	0.0158562	No	NA
355207	G	T	intergenic	SNP	1	1034	0.000967118	SRR1946281	NA
356458	C	A	intergenic	SNP	1	1034	0.000967118	SRR1945758	NA
356808	CT	C	intergenic	Indel	1	1034	0.000967118	SRR1946324	NA
357093	C	G	intergenic	SNP	1	1034	0.000967118	SRR1946424	NA
357254	C	A	intergenic	SNP	3	1034	0.00290135	No	NA
357354	A	C	intergenic	SNP	1	1033	0.000968054	SRR1945541	NA
357898	C	T	intergenic	SNP	2	1034	0.00193424	No	NA
358507	C	A	intergenic	SNP	1	1034	0.000967118	SRR1946118	NA
358511	G	A	intergenic	SNP	1	1034	0.000967118	SRR1946118	NA
358517	G	A	intergenic	SNP	1	1034	0.000967118	SRR1946118	NA
358522	T	C	intergenic	SNP	1	1034	0.000967118	SRR1946118	NA
358537	G	T	intergenic	SNP	32	1034	0.0309478	No	NA
358571	T	G	intergenic	SNP	1	1033	0.000968054	SRR1946310	NA
358811	G	T	intergenic	SNP	61	1019	0.0598626	No	NA
358812	A	G	intergenic	SNP	59	1020	0.0578431	No	NA
358987	G	T	intergenic	SNP	4	905	0.00441989	No	NA
358996	T	A	intergenic	SNP	1	914	0.00109409	SRR1946417	NA
359246	A	G	intergenic	SNP	8	1022	0.00782779	No	NA
359249	C	T	intergenic	SNP	7	1022	0.00684932	No	NA
359251	C	T	intergenic	SNP	8	1023	0.00782014	No	NA
359285	C	T	intergenic	SNP	4	1019	0.00392542	No	NA
359957	CT	C	intergenic	Indel	1	765	0.00130719	SRR1945572	NA
359957	C	A	intergenic	SNP	2	765	0.00261438	No	NA
360925	G	T	intergenic	SNP	1	1004	0.000996016	SRR1946232	G
360972	C	A	intergenic	SNP	1	924	0.00108225	SRR1946324	C
360986	A	G	intergenic	SNP	495	915	0.459016	No	G
361033	CT	C	intergenic	Indel	3	829	0.00361882	No	NA
361033	C	CT	intergenic	Indel	13	829	0.0156815	No	NA
361051	C	A	intergenic	SNP	10	785	0.0127389	No	C
361138	A	C	intergenic	SNP	1	906	0.00110375	SRR1946080	A
361231	A	T	intergenic	SNP	260	718	0.362117	No	A
361232	A	T	intergenic	SNP	263	718	0.366295	No	A
361542	GTGTCT	G	intergenic	Indel	4	947	0.00422386	No	NA
362184	G	A	intergenic	SNP	3	1033	0.00290416	No	G
362921	G	A	intergenic	SNP	3	1030	0.00291262	No	G
363399	C	A	intergenic	SNP	3	993	0.00302115	No	C
364267	G	T	intergenic	SNP	3	1032	0.00290698	No	NA
364518	C	T	intergenic	SNP	4	1034	0.00386847	No	NA
365062	G	T	intergenic	SNP	1	1033	0.000968054	SRR1946243	NA
365573	C	A	intergenic	SNP	1	1027	0.00097371	SRR1946388	NA
366868	C	T	intergenic	SNP	1	1032	0.000968992	SRR1946129	NA
366983	C	T	intergenic	SNP	4	1032	0.00387597	No	NA
367122	G	C	intergenic	SNP	2	1034	0.00193424	No	NA
367578	G	A	intergenic	SNP	11	1034	0.0106383	No	NA
367645	C	T	intergenic	SNP	1	1034	0.000967118	SRR1945758	NA
367678	G	A	intergenic	SNP	1	1034	0.000967118	SRR1946296	NA
367694	G	T	intergenic	SNP	1	1034	0.000967118	SRR1945578	NA
367766	G	A	intergenic	SNP	87	938	0.0927505	No	NA
